# Supplementary material
Source: PubMed Central journal article supplement (PMC3277177)

Figure S4-1

CONTROL

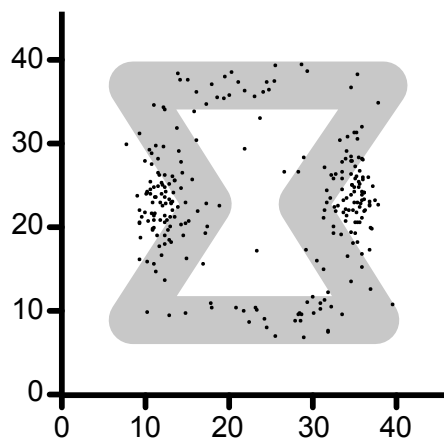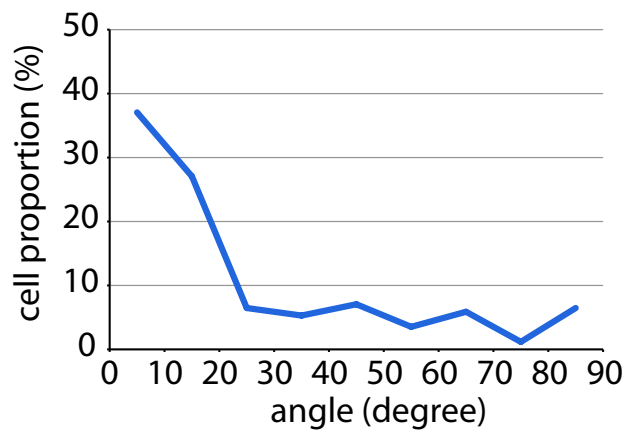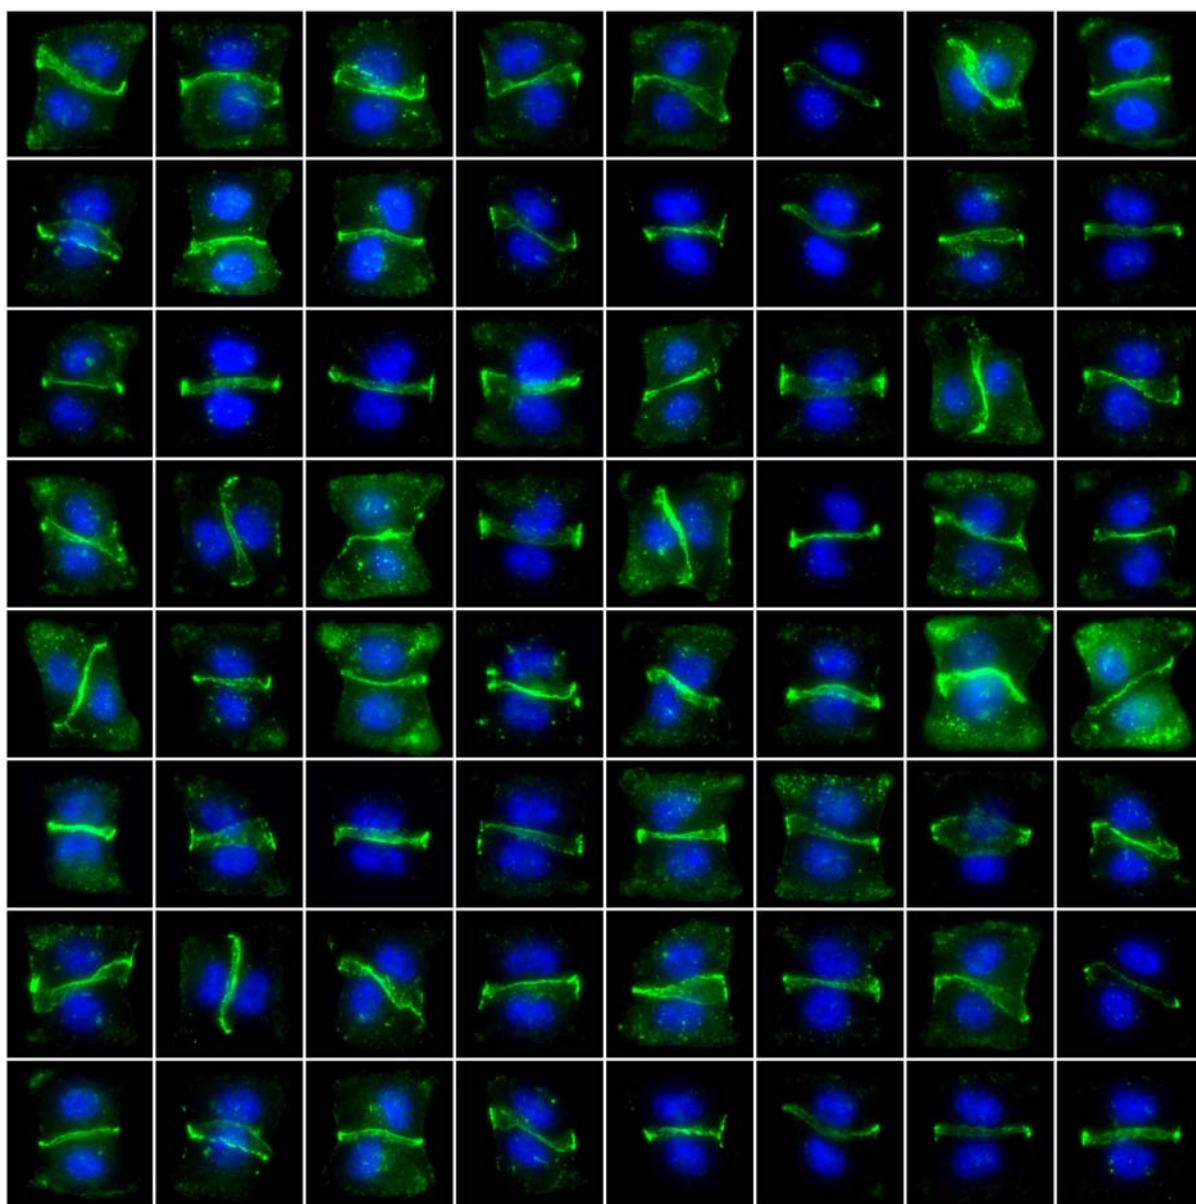

Figure S4-2

FAK inactivation with PF573528, 1  $\mu$ M

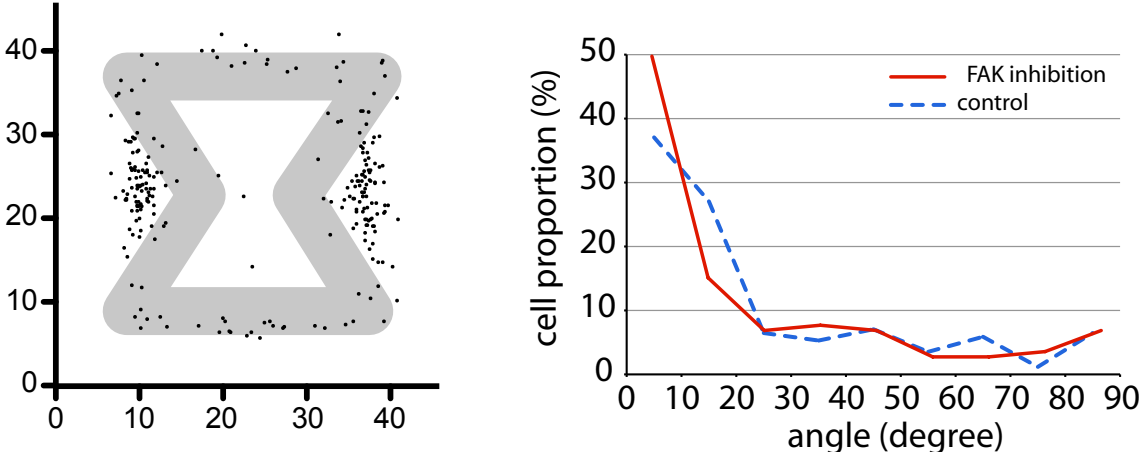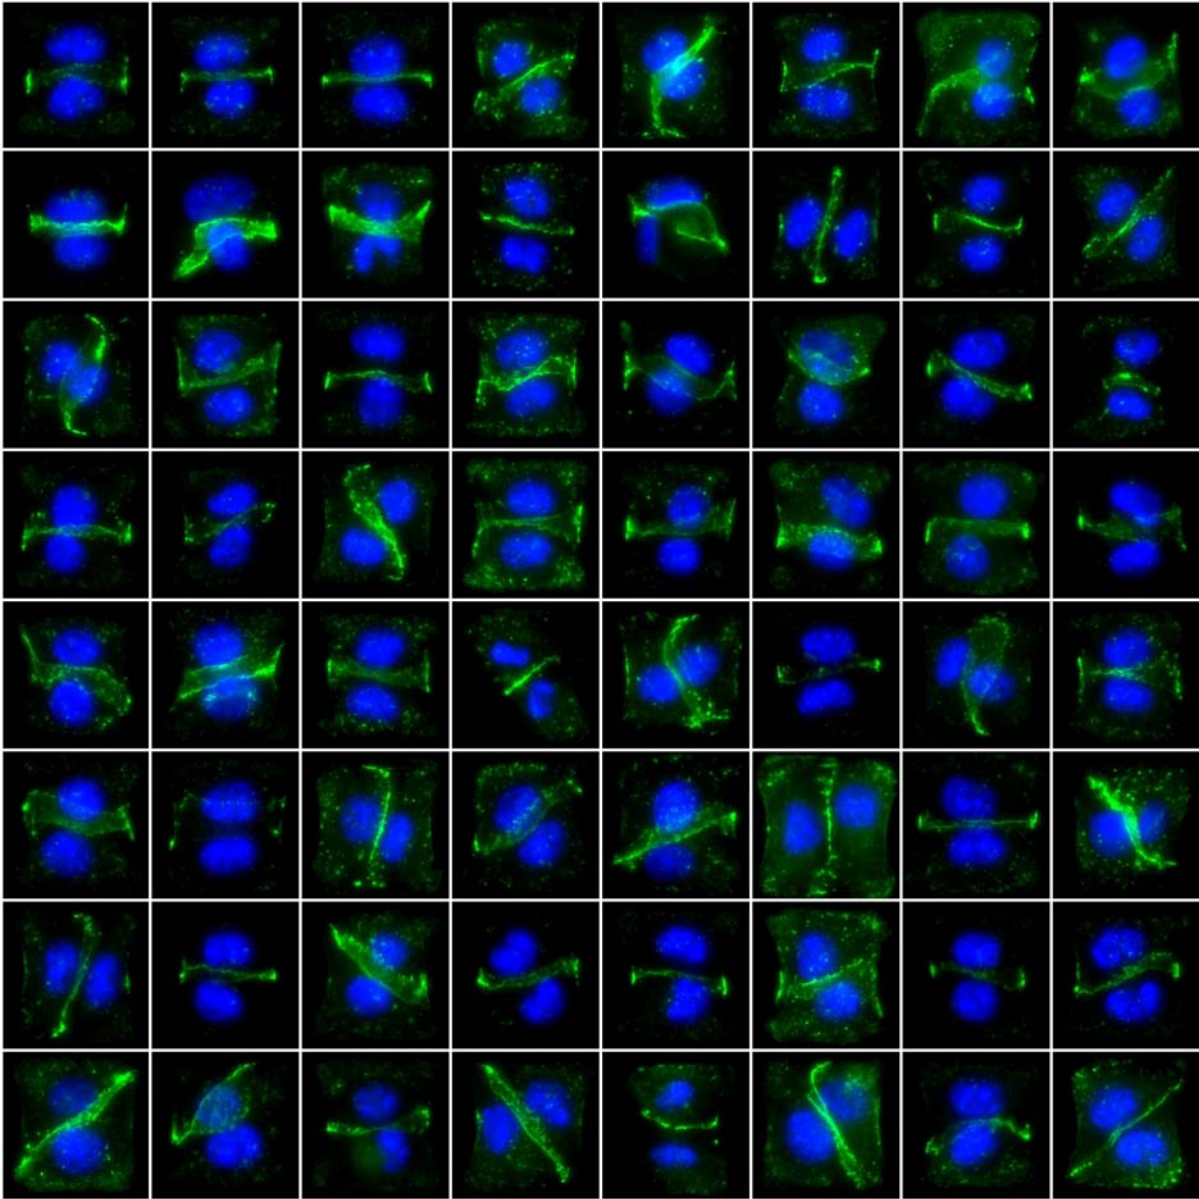

Figure S4-3

ERK1 inactivation with PD98059, 2 $\mu$ M

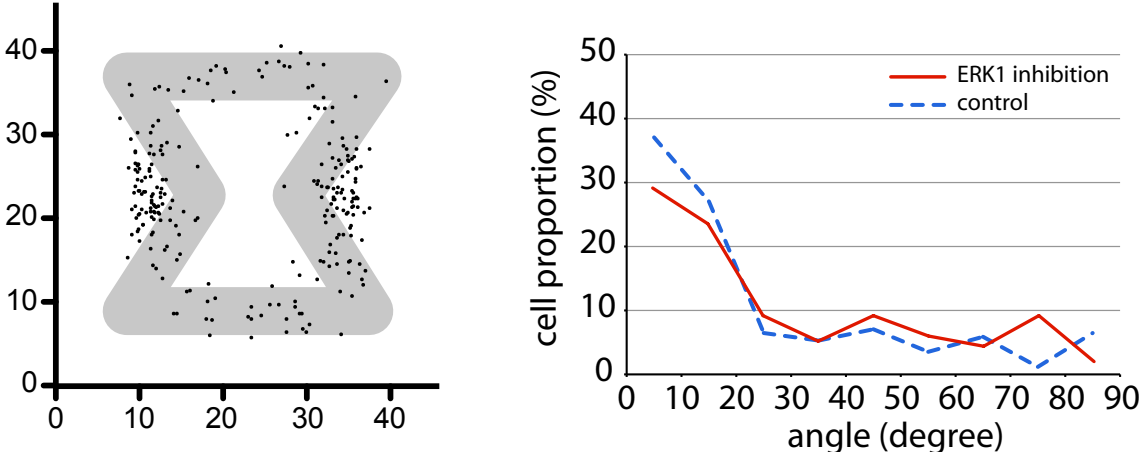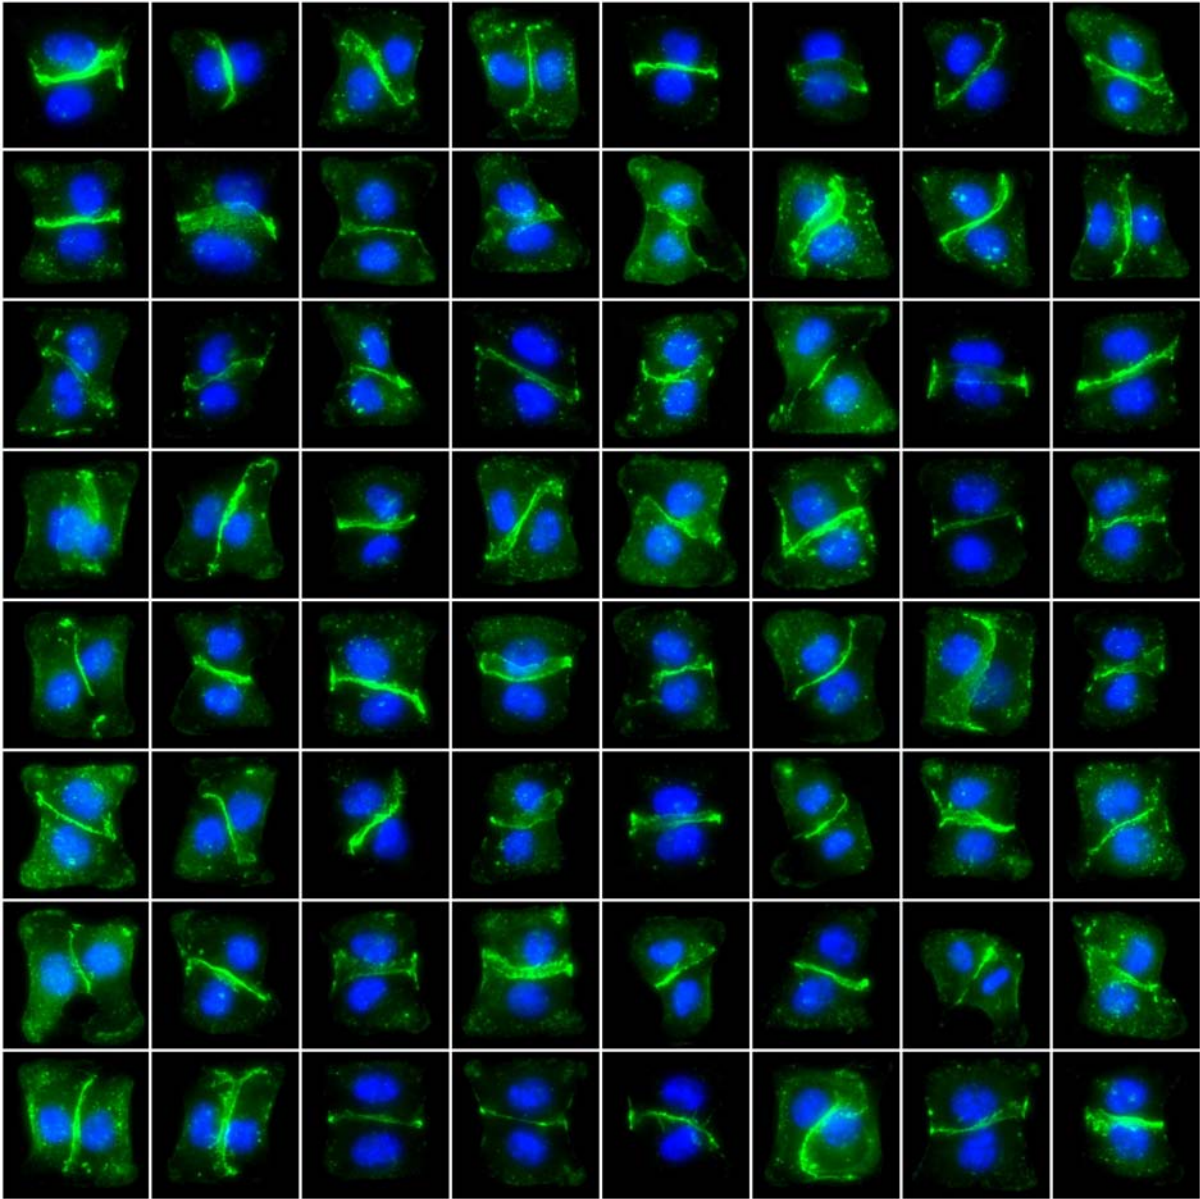

Figure S4-4

Src inactivation with SU6656, 5 $\mu$ M

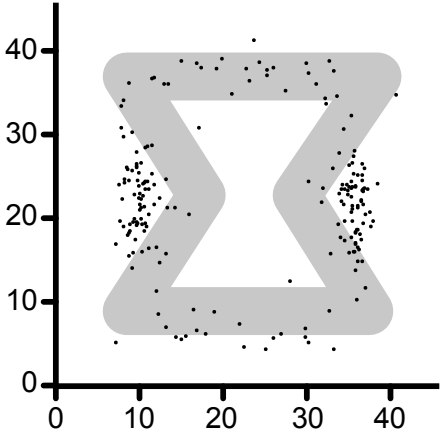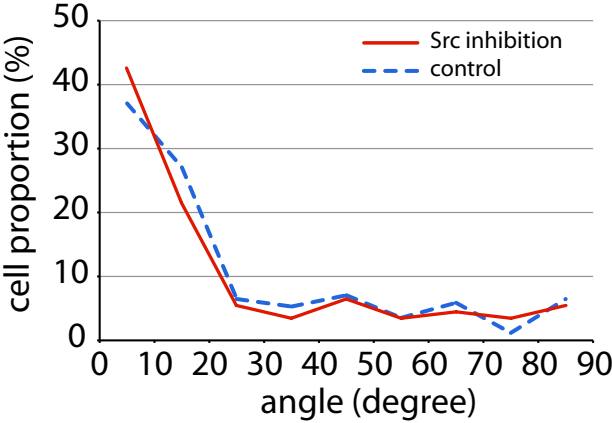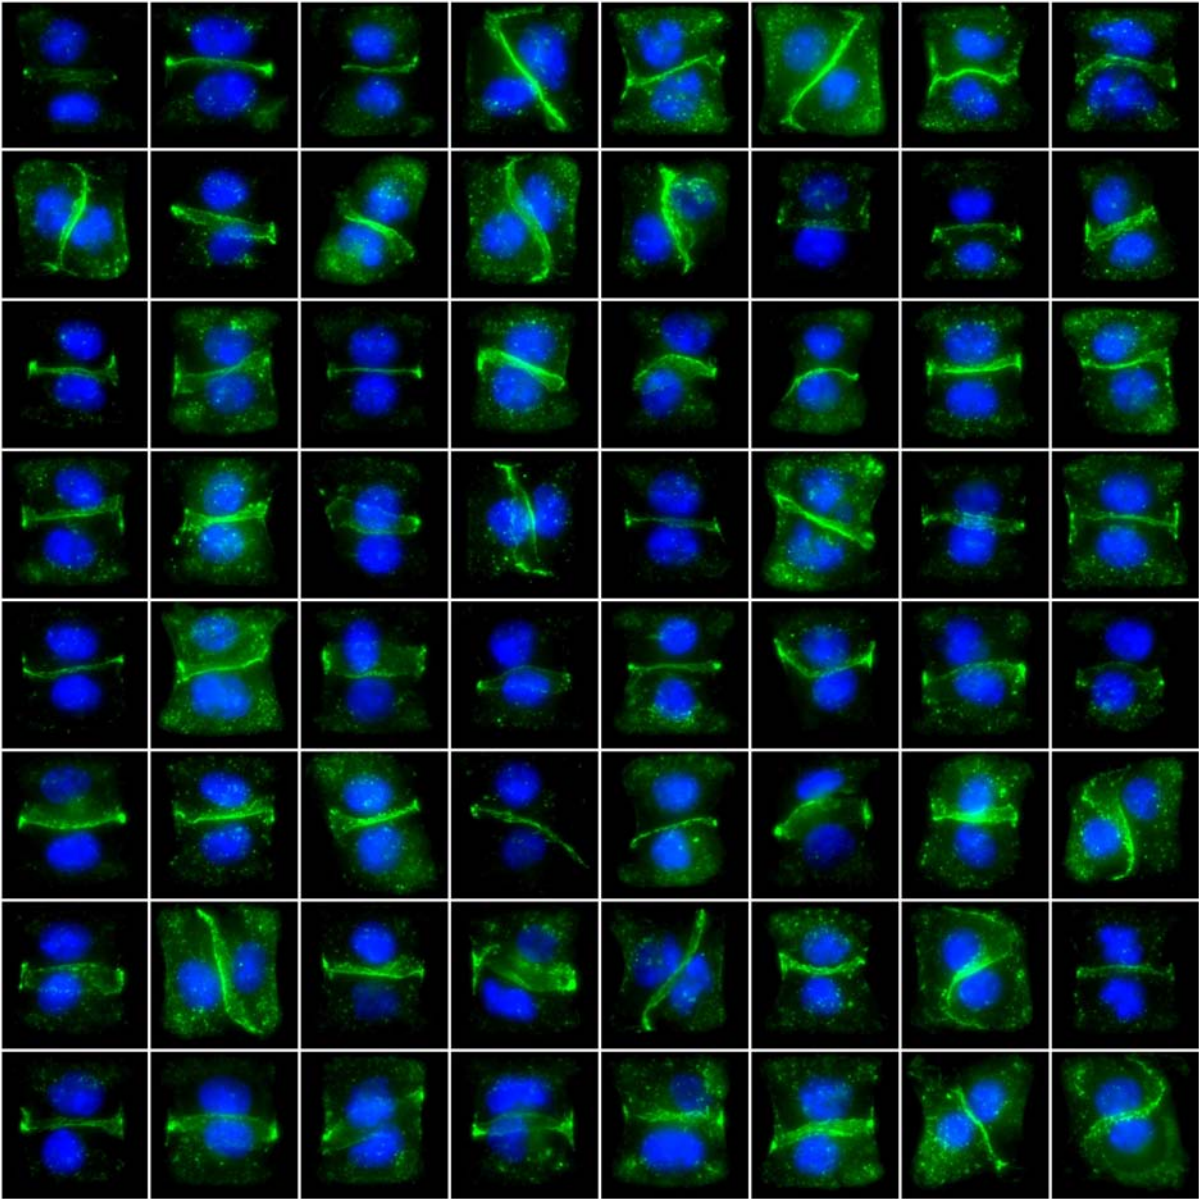

Figure S4-5

JNK inactivation with SP600125, 1,8 $\mu$ M

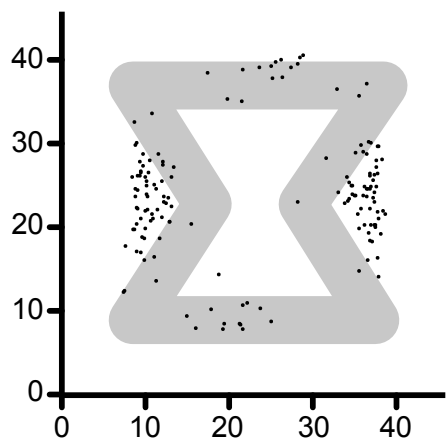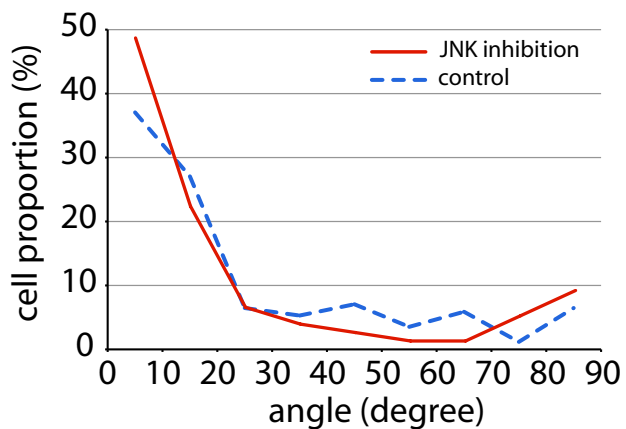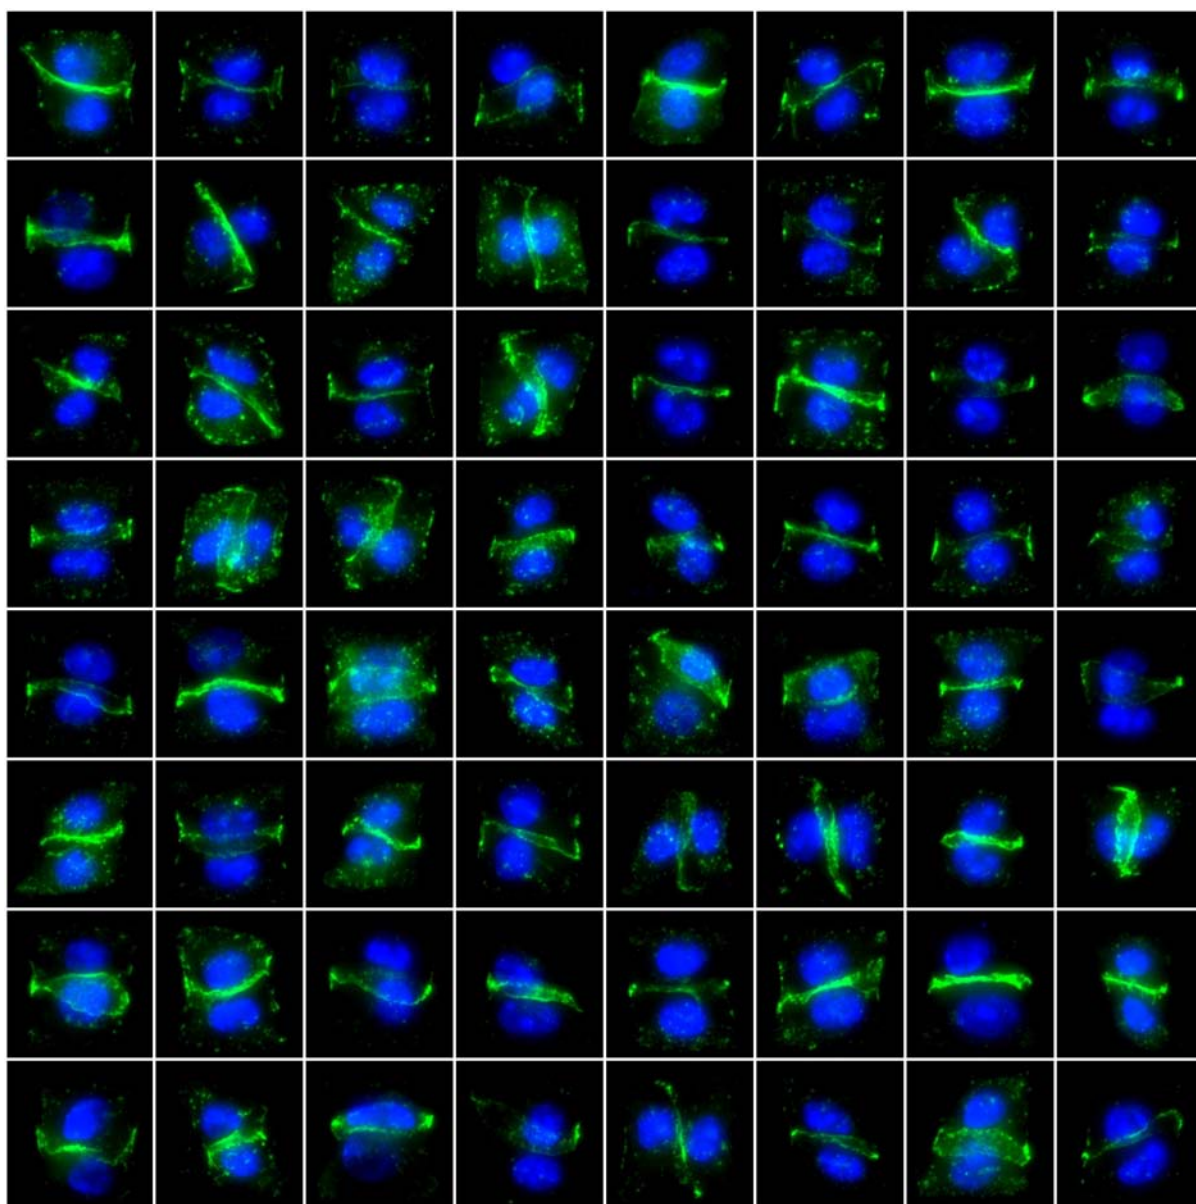

Figure S4-6

ROCK inactivation with Y27632, 5 $\mu$ M

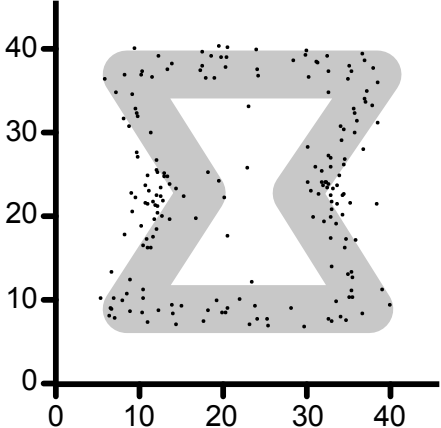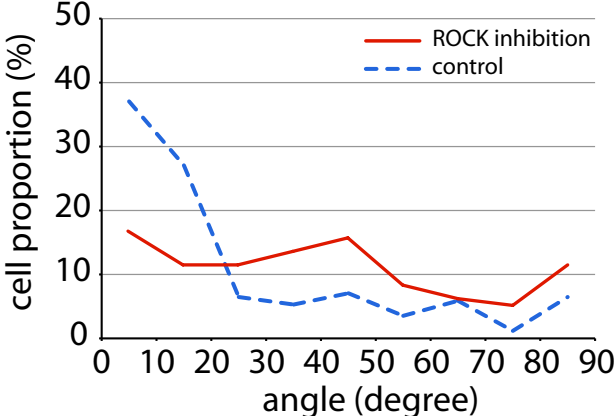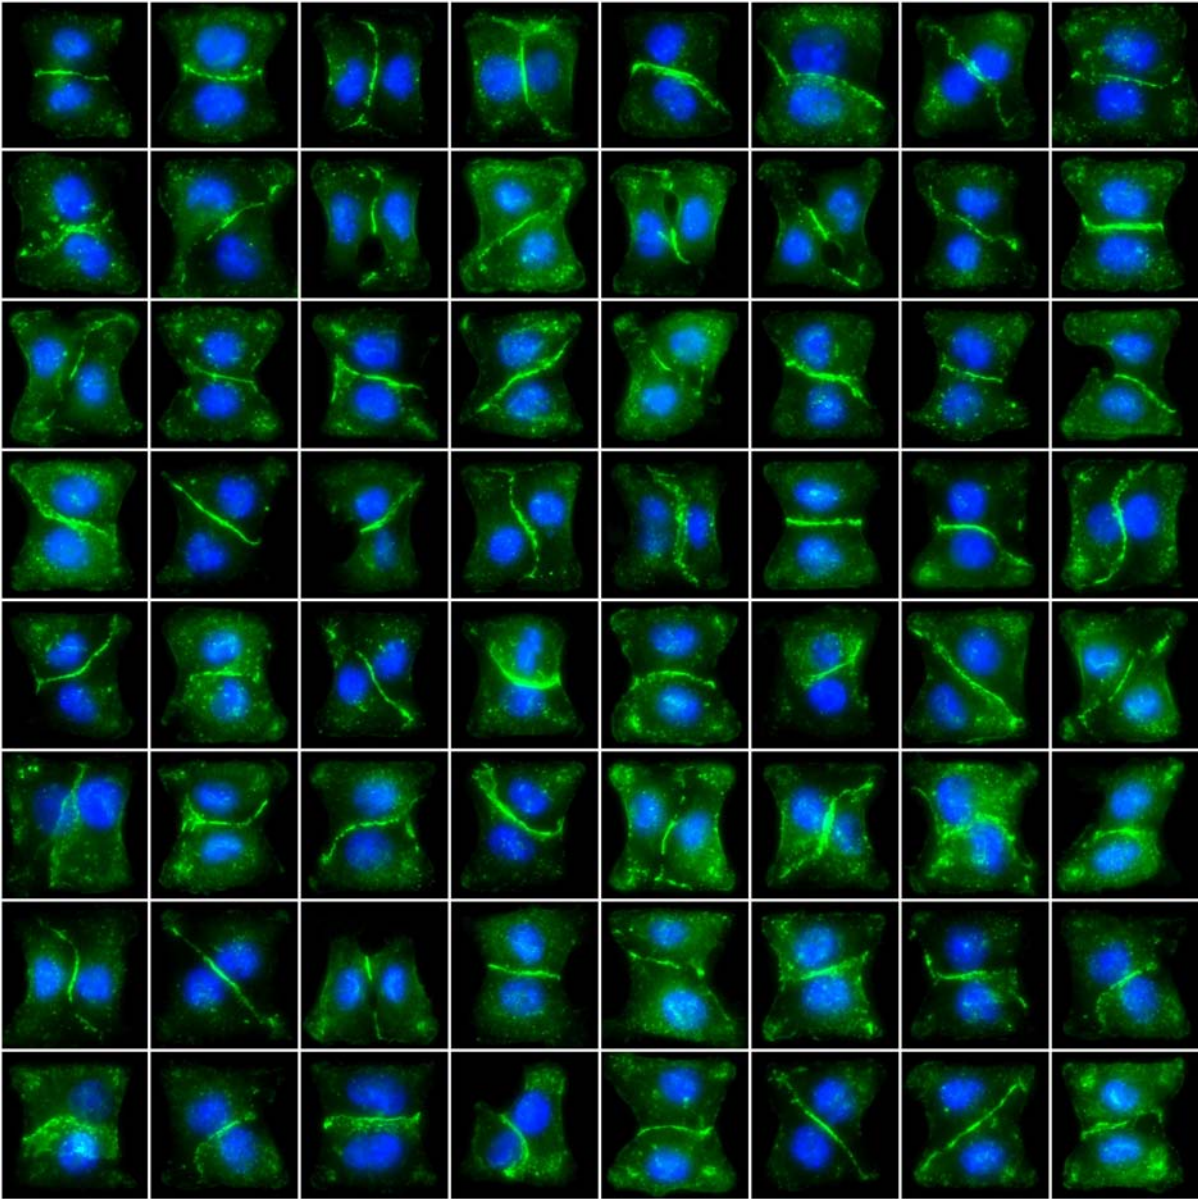

Figure S4-7

Myosin II inactivation with Blebbistatin, 15 $\mu$ M

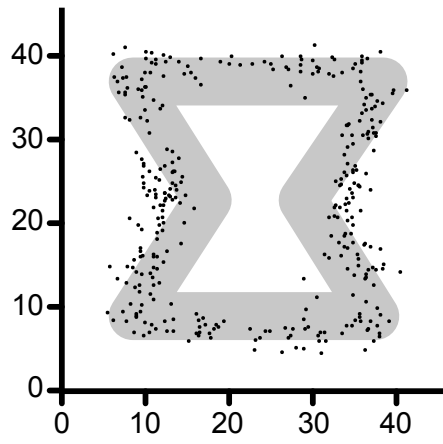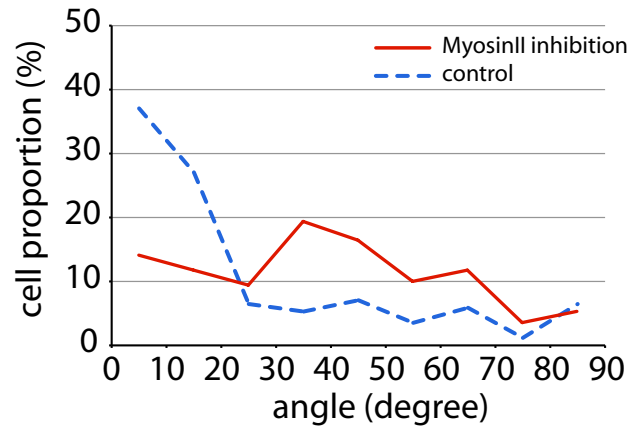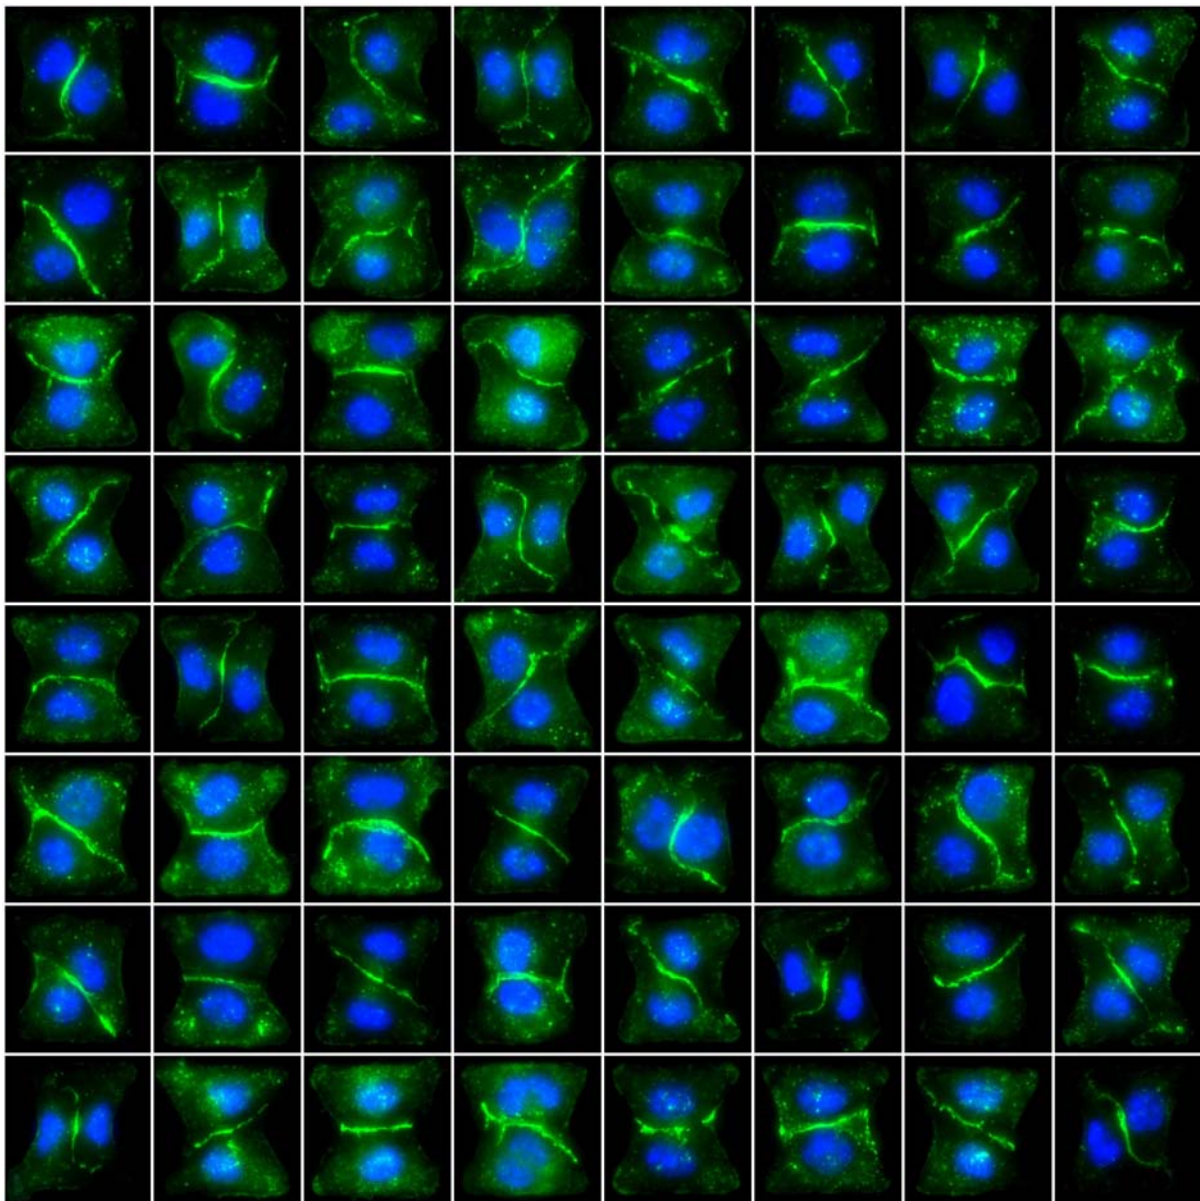

Figure S4-8

MLCK inactivation with ML7, 5 $\mu$ M

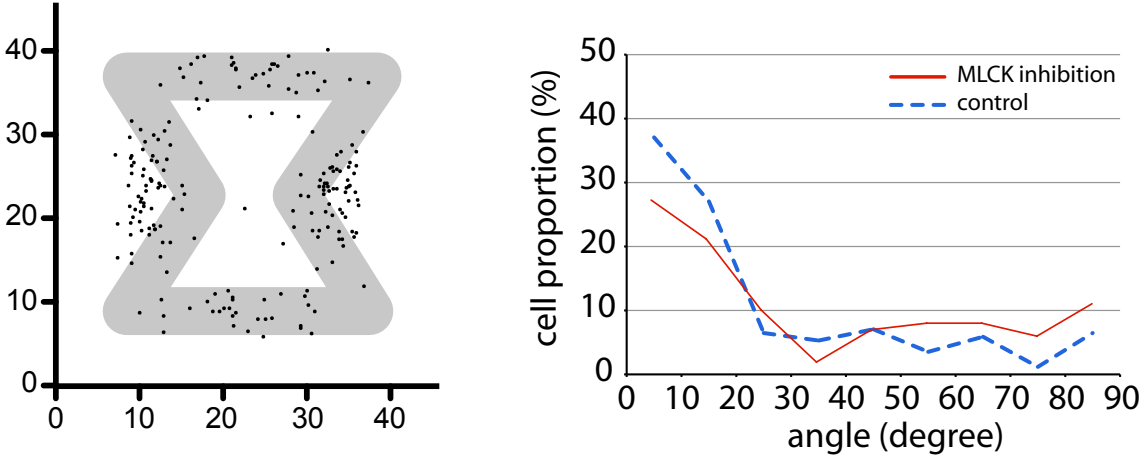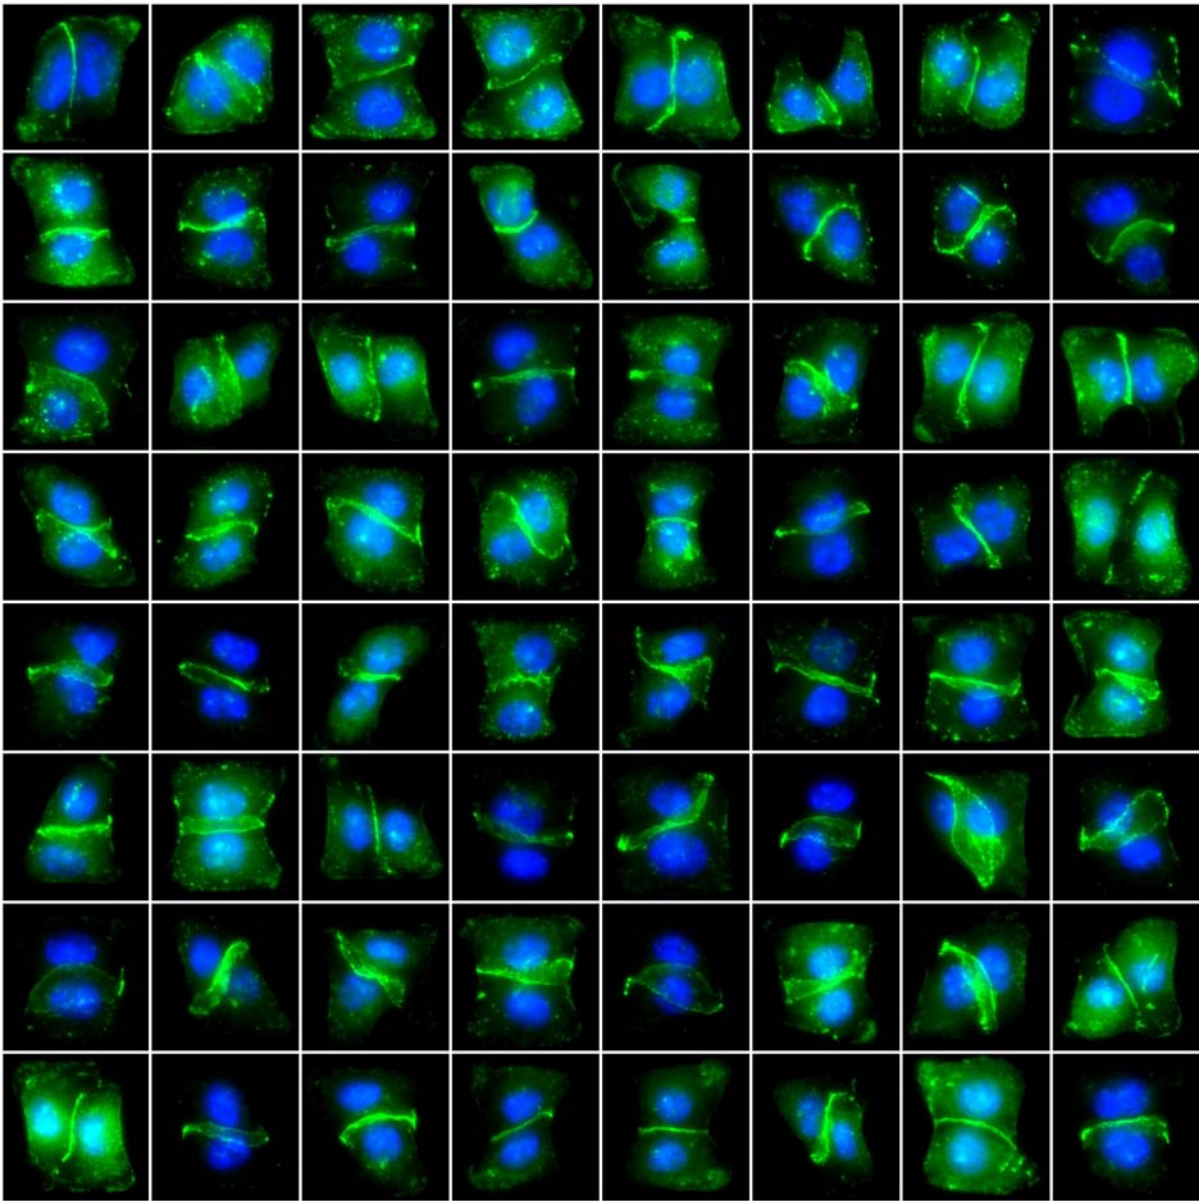



Figure S4-9

Rac inactivation with NCS23766, 5 $\mu$ M

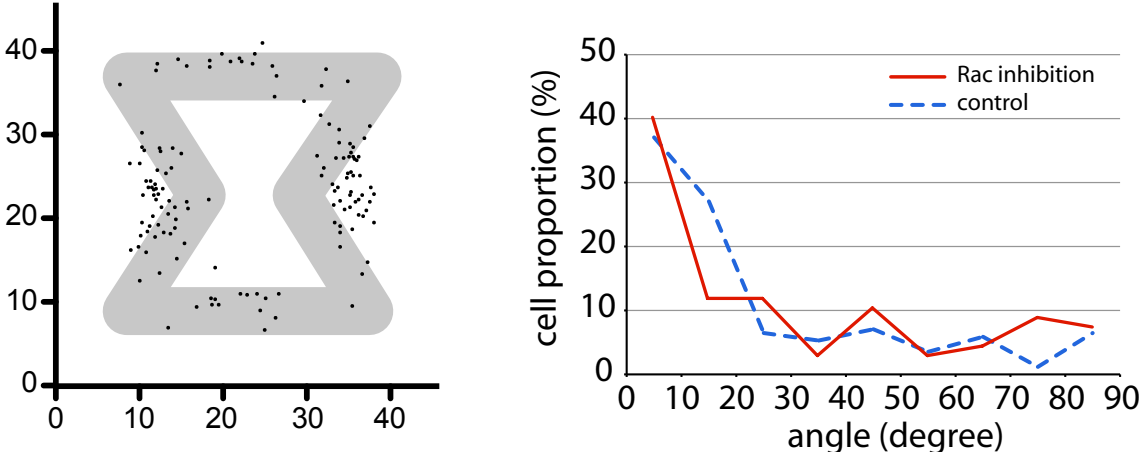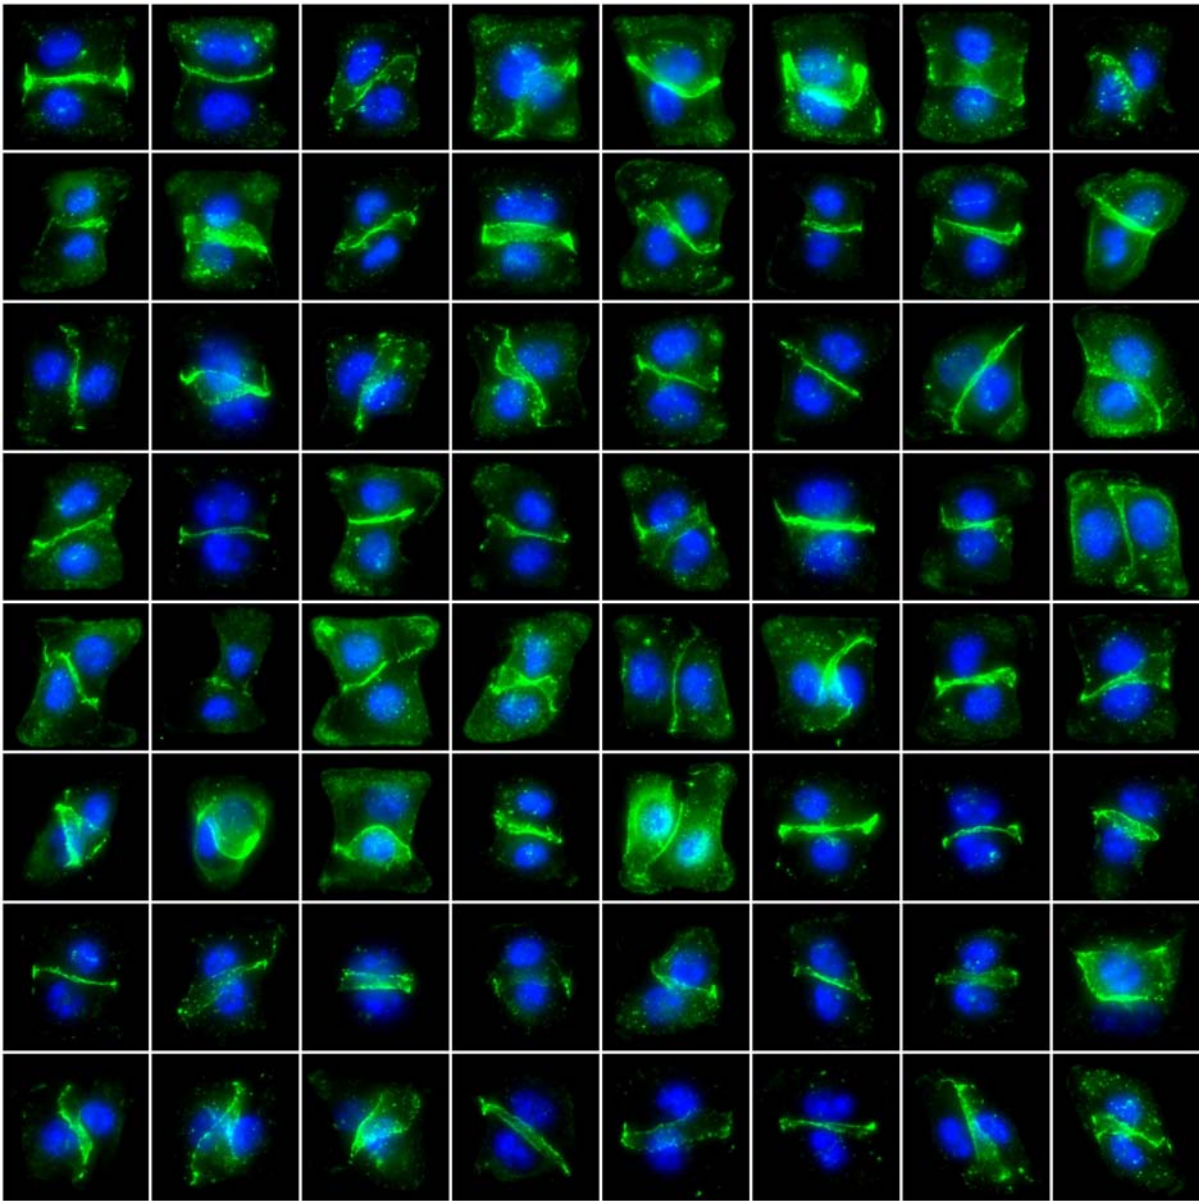

Figure S4-10

laminin on micropattern

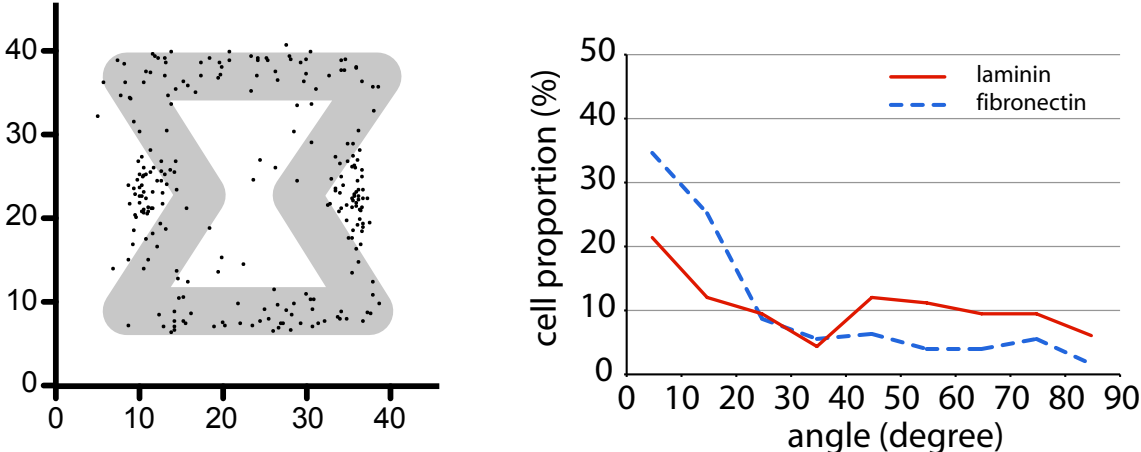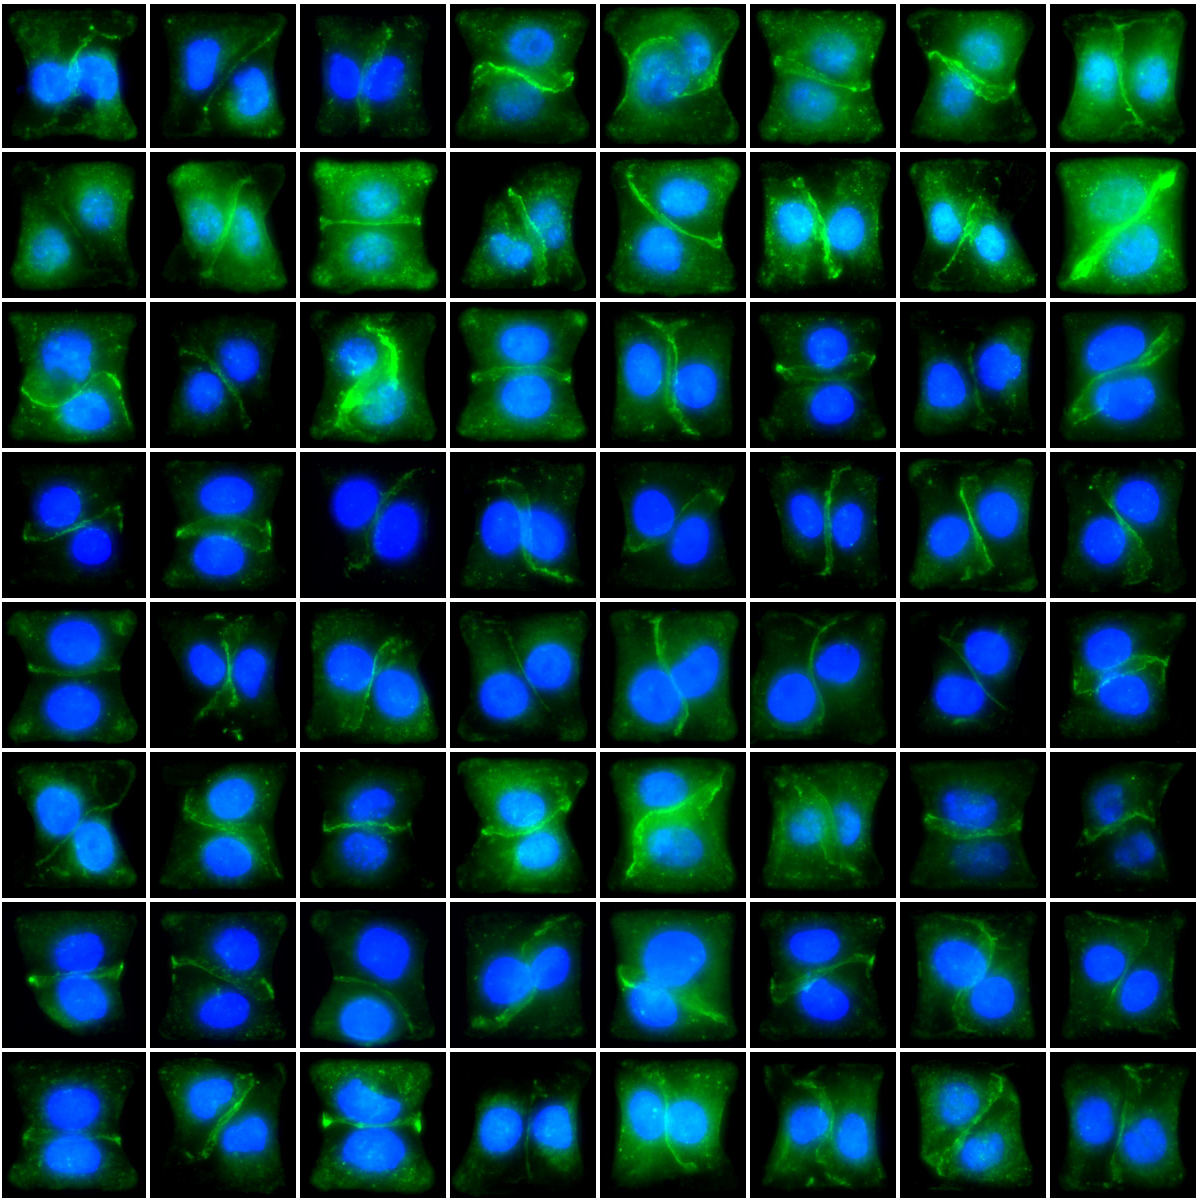

Figure S4-11

siRNA against GFP (si RNA control)

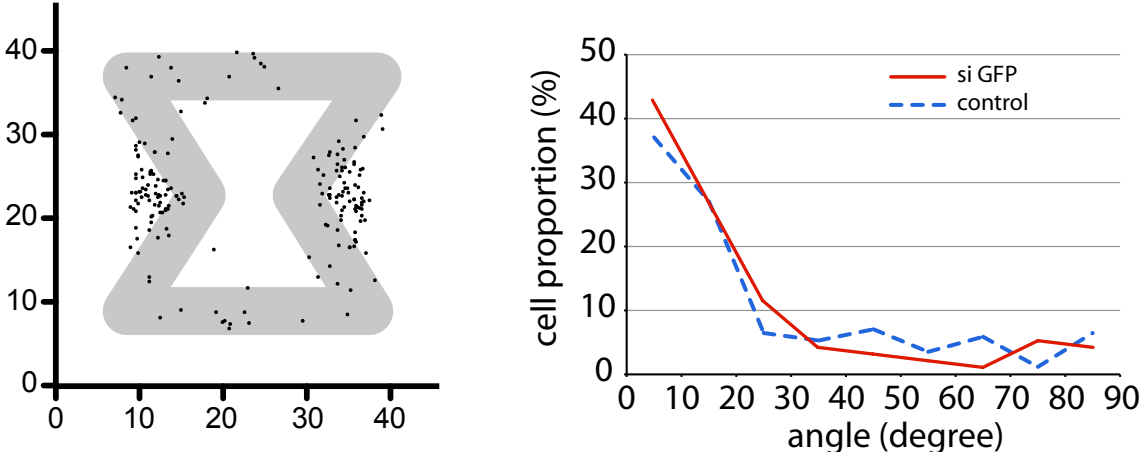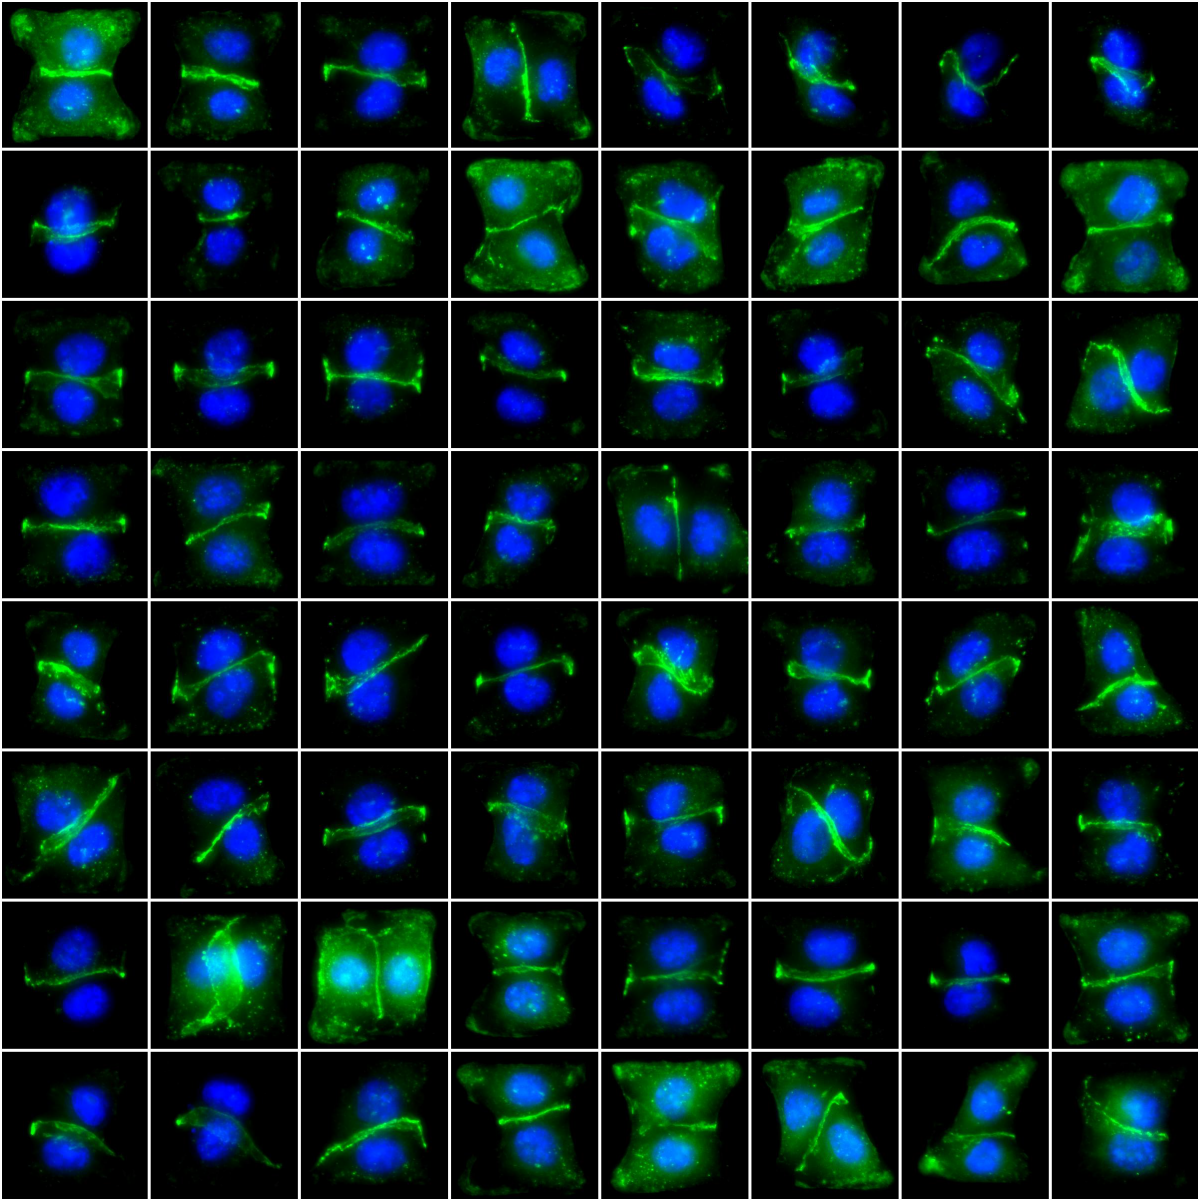

Figure S4-12

siRNA against p120-catenin

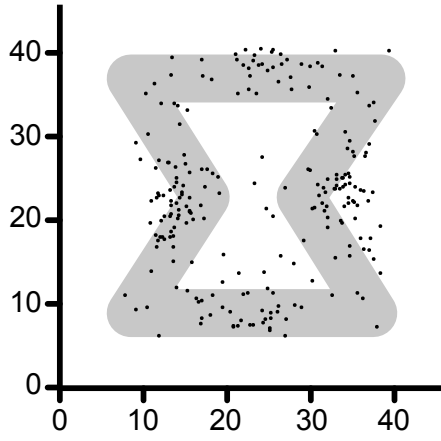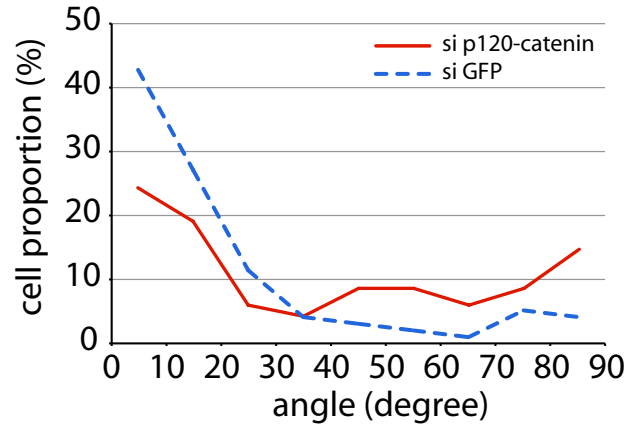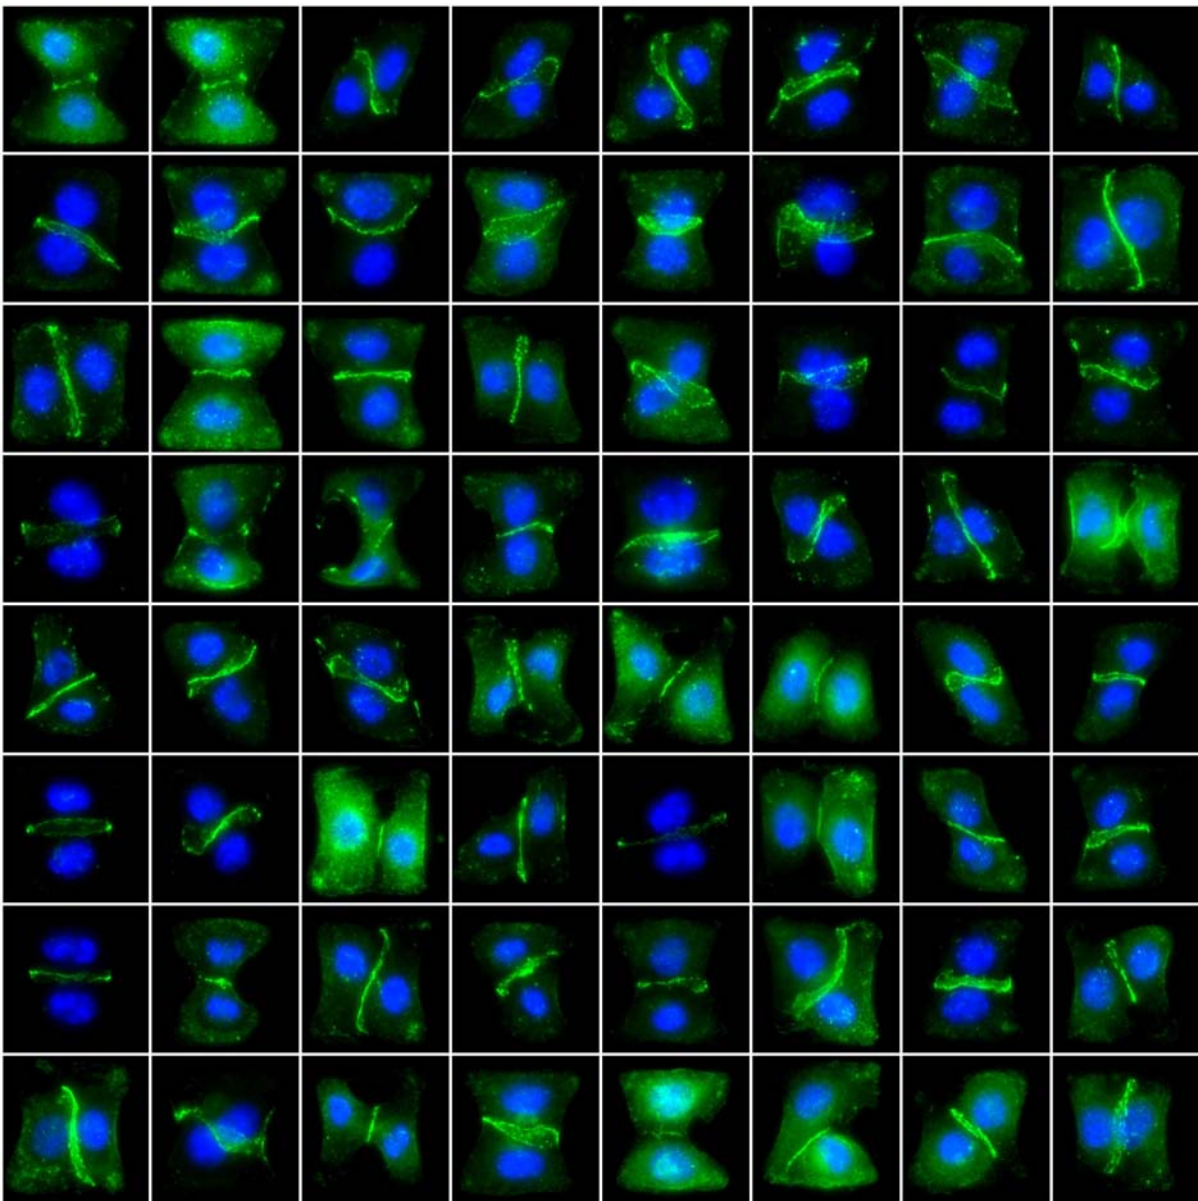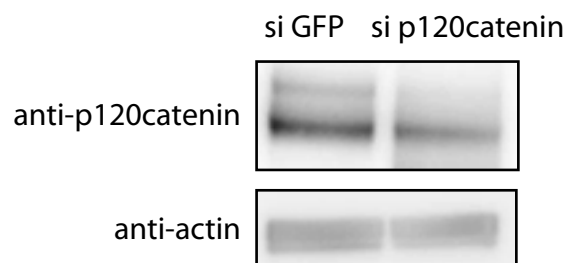

Supplement: 1106377109_sfig04.pdf [file 1106377109_sfig04.pdf]
