# Supplementary material
Source: PubMed Central journal article supplement (PMC3277177)
Supplement: 1106377109_sfig03.pdf [file 1106377109_sfig03.pdf]

Figure S3: Cell division orientation is not sufficient to determine daughter cell positioning

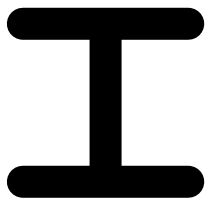

CELL DIVISION  
ORIENTATION

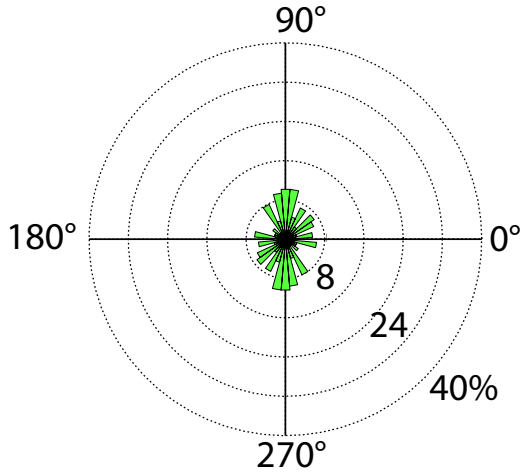

N cell = 117  
N angle = 117

DAUGHTER CELL DOUBLET  
ORIENTATION

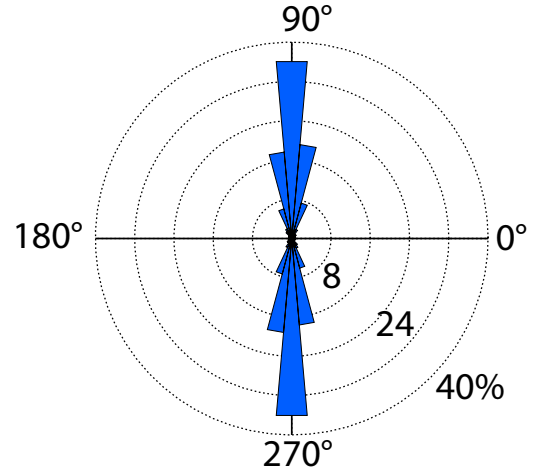

N cell = 117  
N angle = 5442

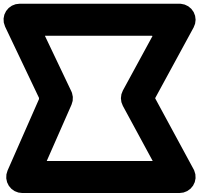

CELL DIVISION  
ORIENTATION

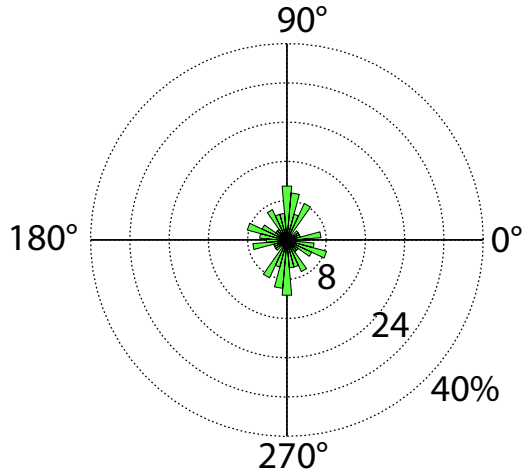

N cell = 69  
N angle = 69

DAUGHTER CELL DOUBLET  
ORIENTATION

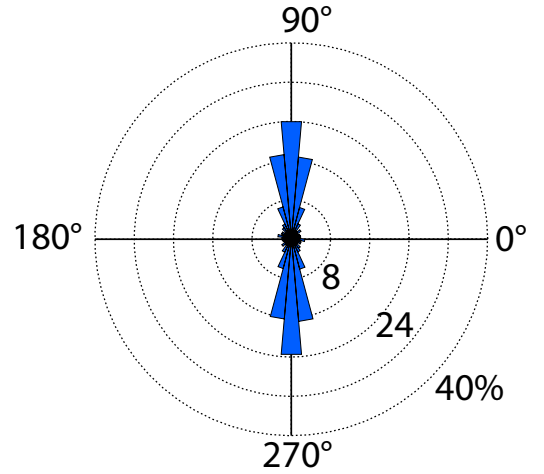

N cell = 69  
N angle = 3991
