# Supplementary material
Source: PubMed Central journal article supplement (PMC3277177)

Figure S1: automated analysis of cell position and movements

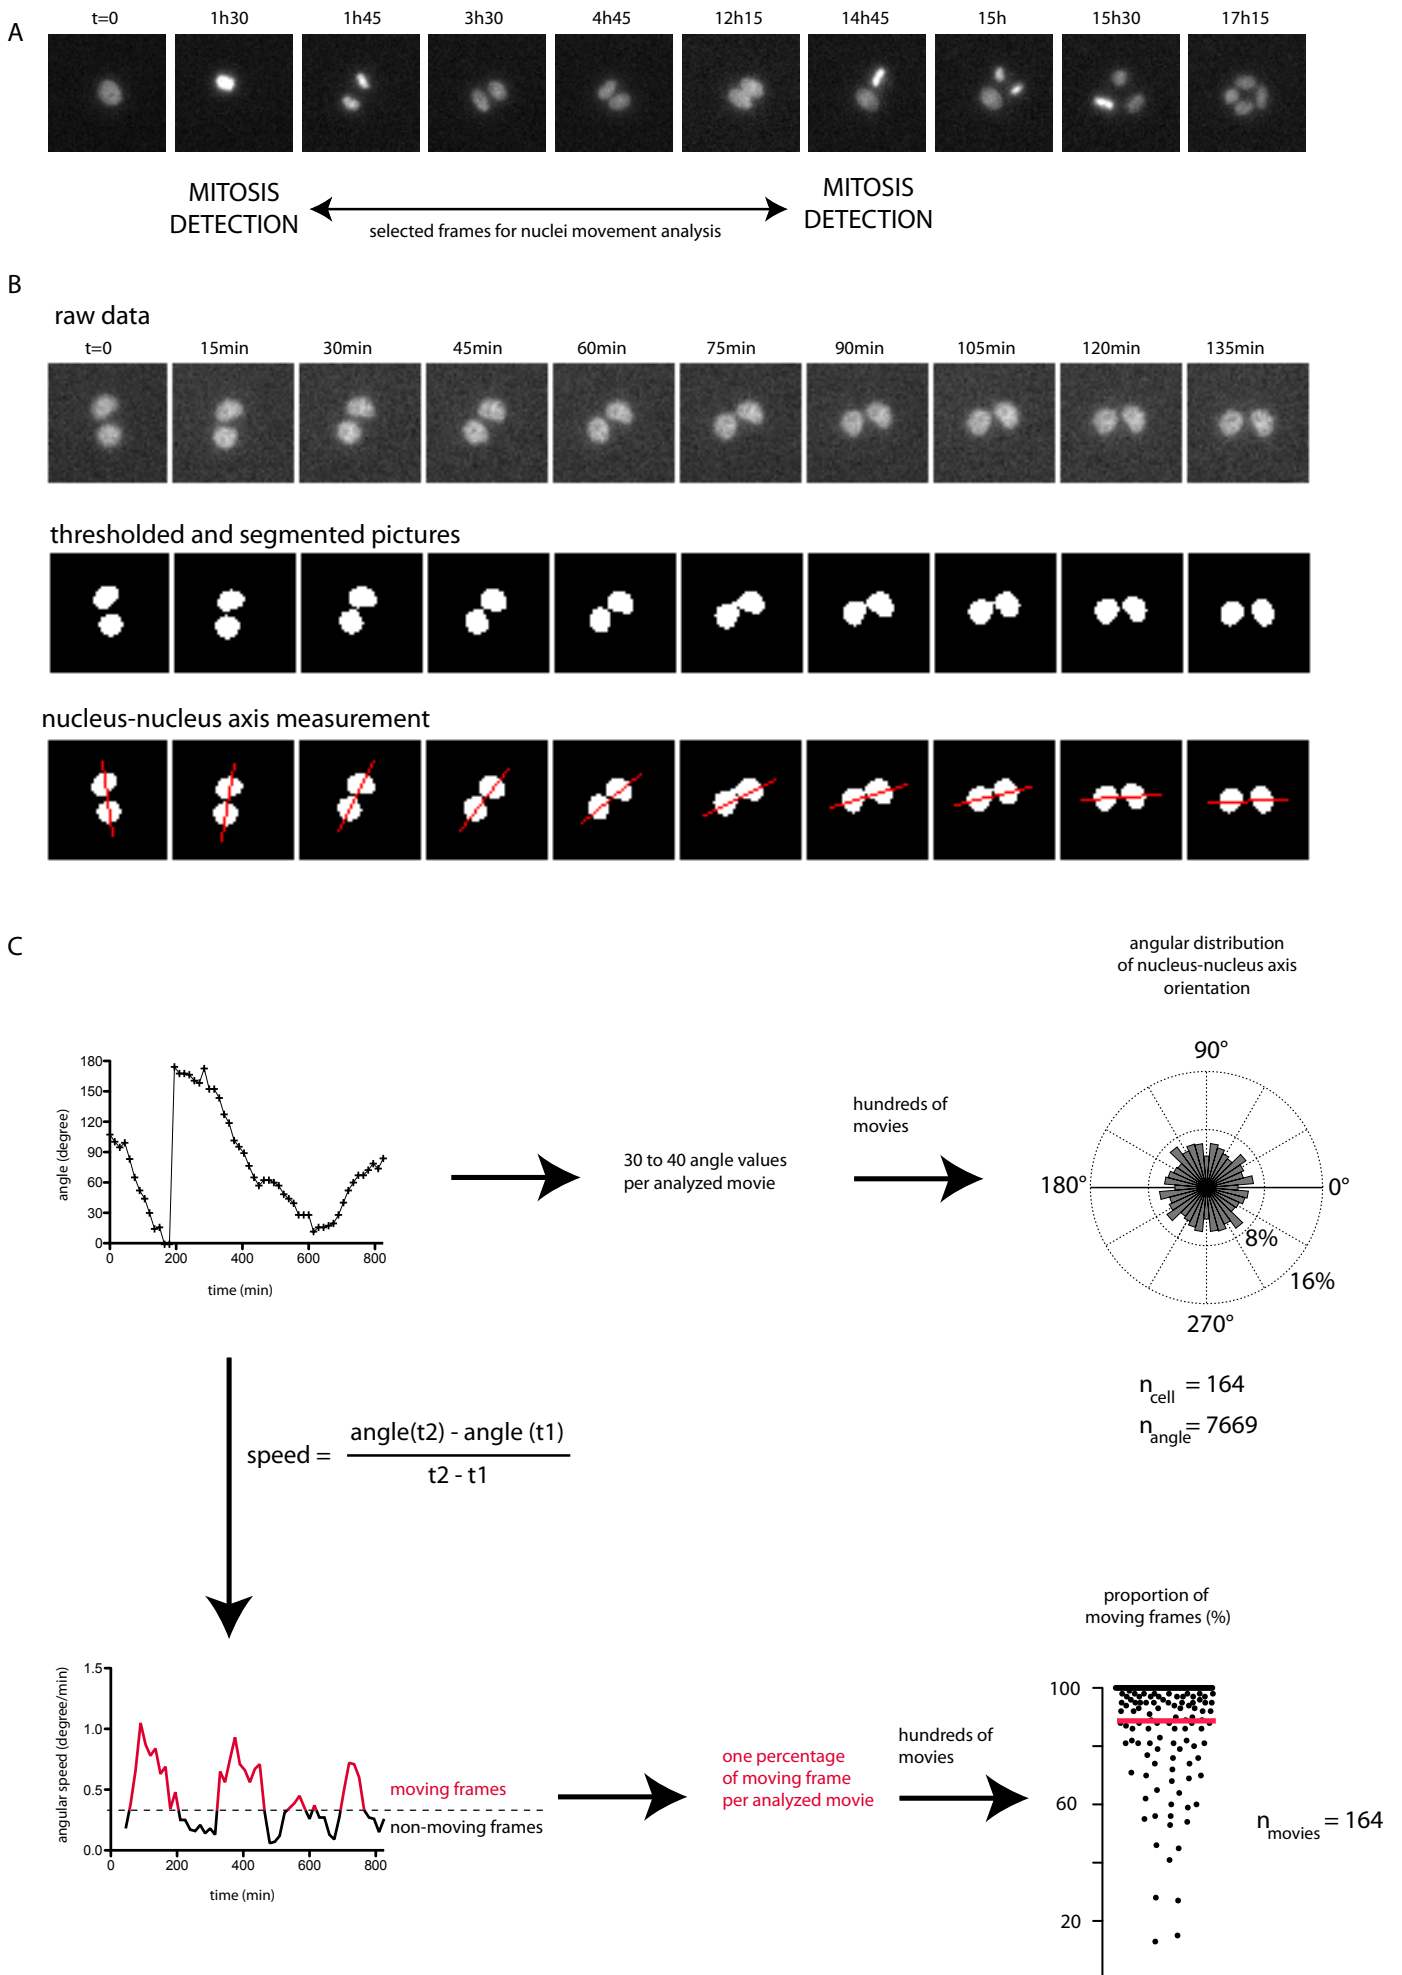

Supplement: 1106377109_sfig01.pdf [file 1106377109_sfig01.pdf]

Figure S2: Intercellular junctions are stabilised by absence of ECM at their extremities

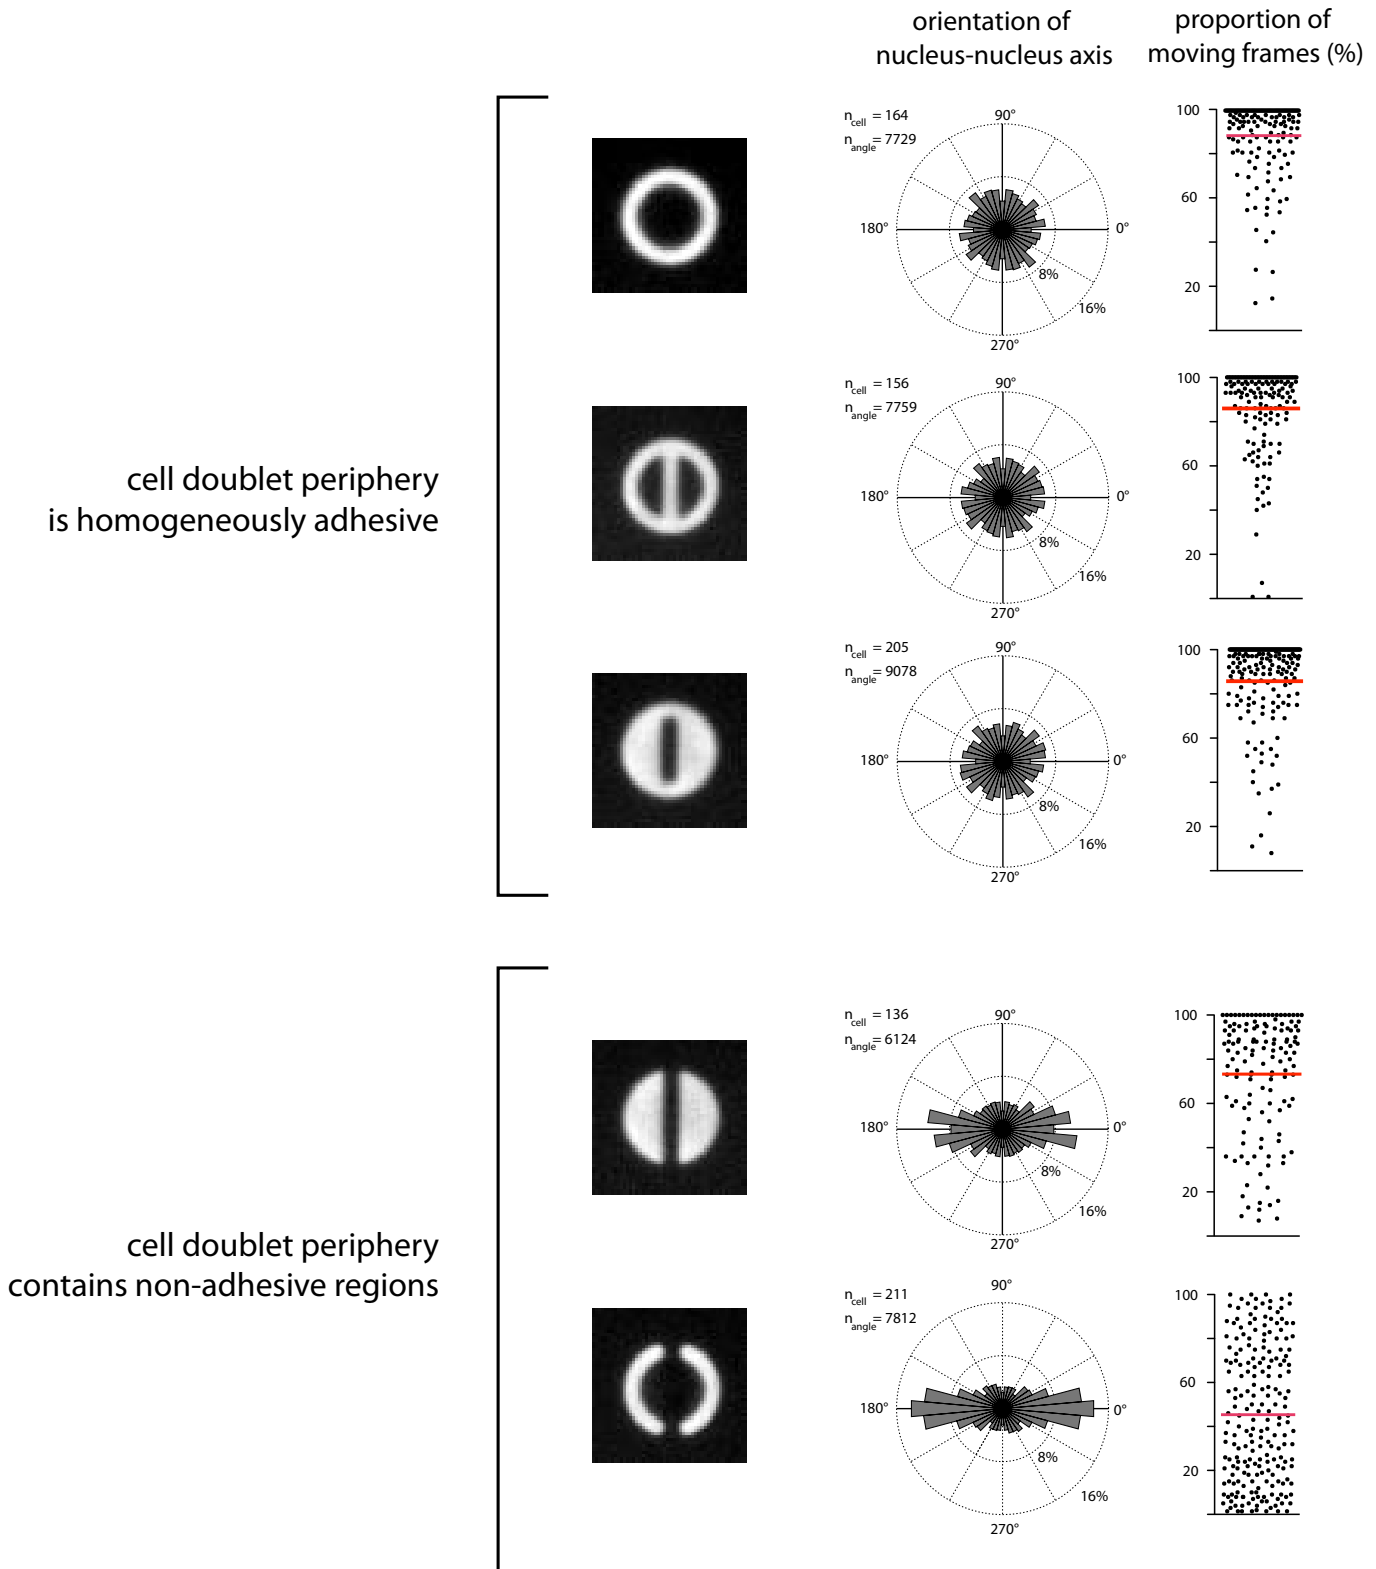

Supplement: 1106377109_sfig02.pdf [file 1106377109_sfig02.pdf]

Figure S5: Comparison between genuine cell-cell force and «inter» force

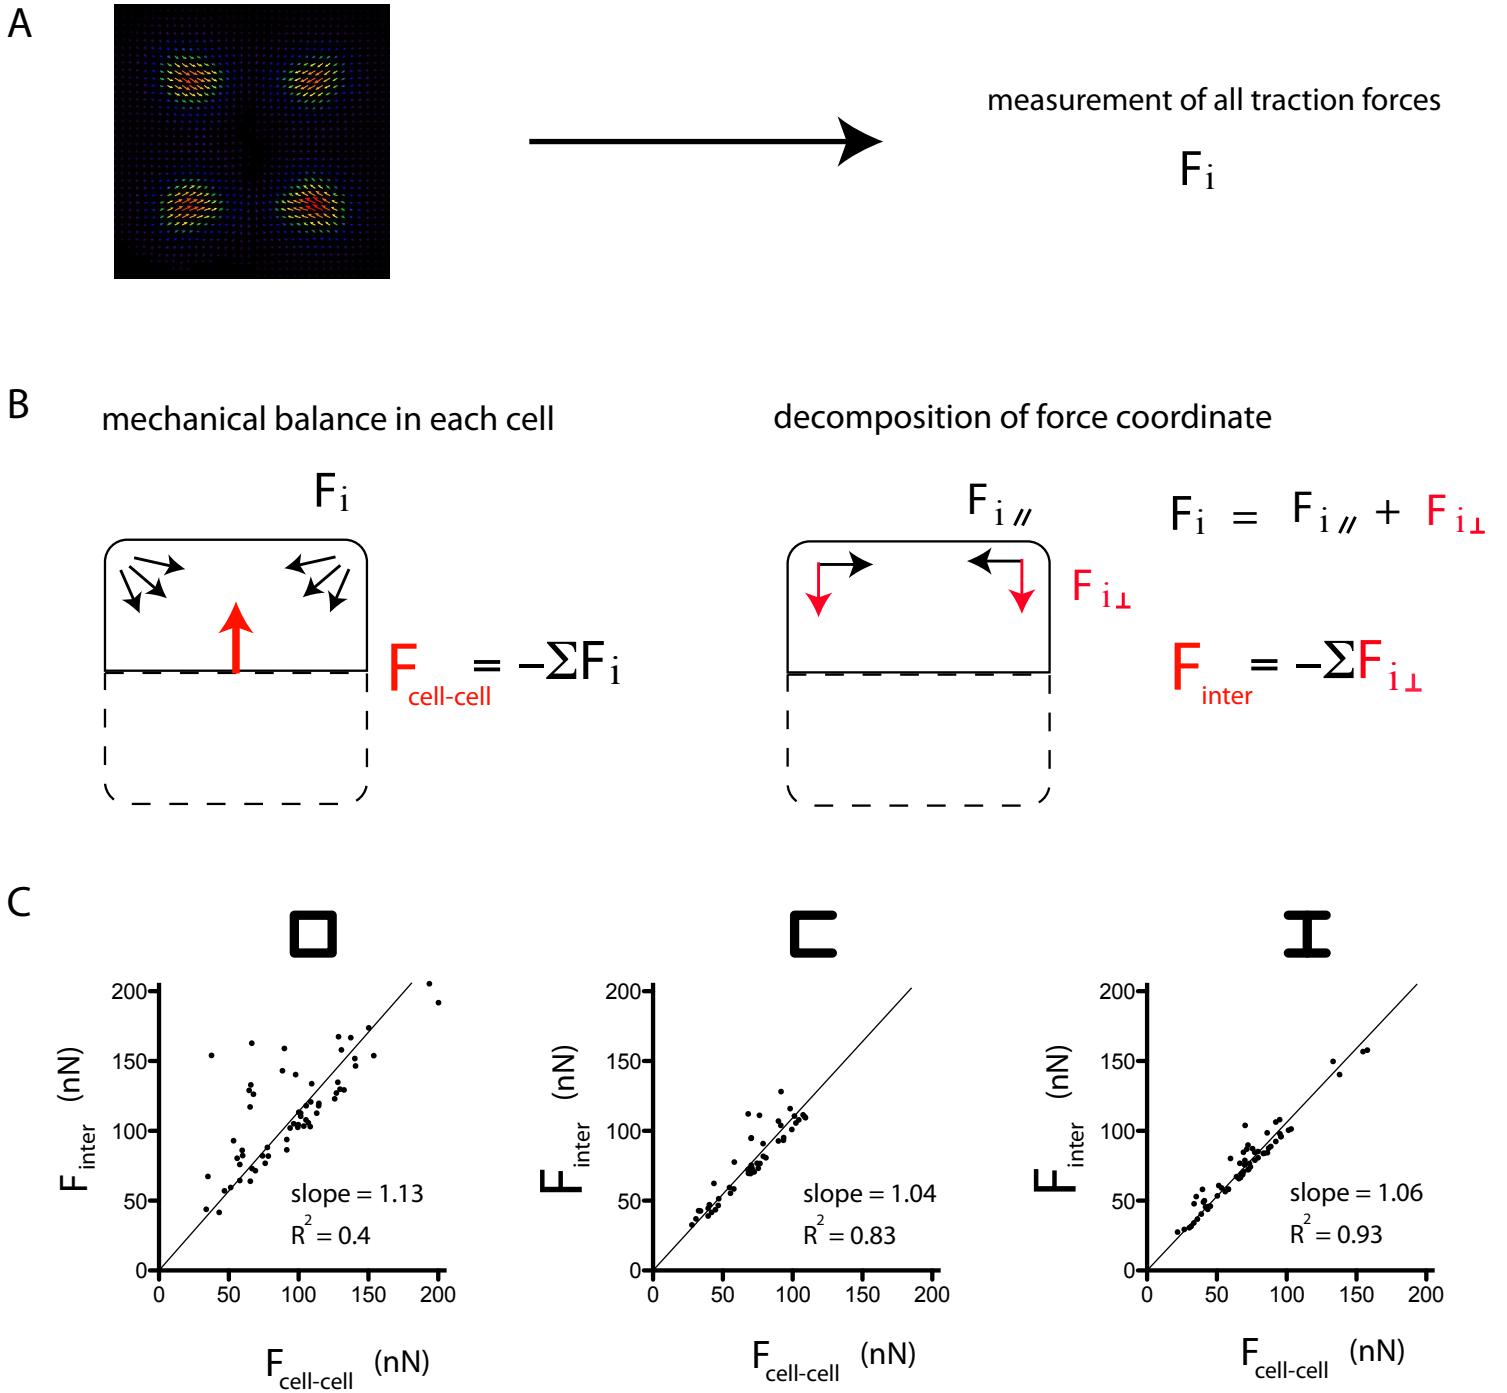

Supplement: 1106377109_sfig05.pdf [file 1106377109_sfig05.pdf]

Figure S6: ECM induces opposite effect on intra- and inter-cellular forces

A

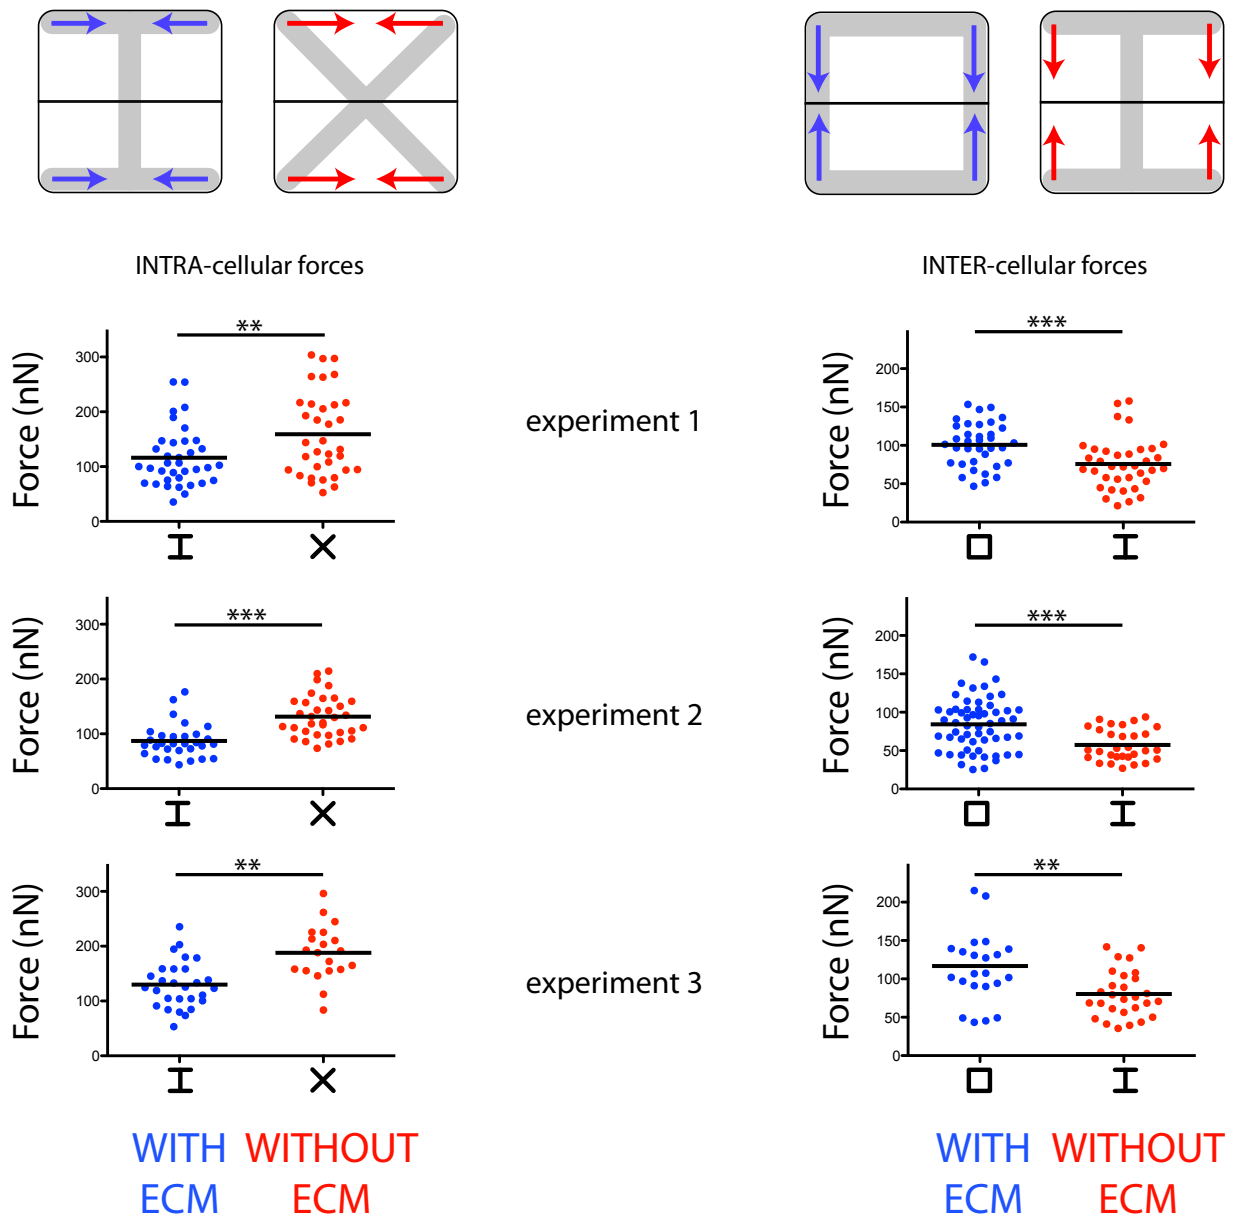

B

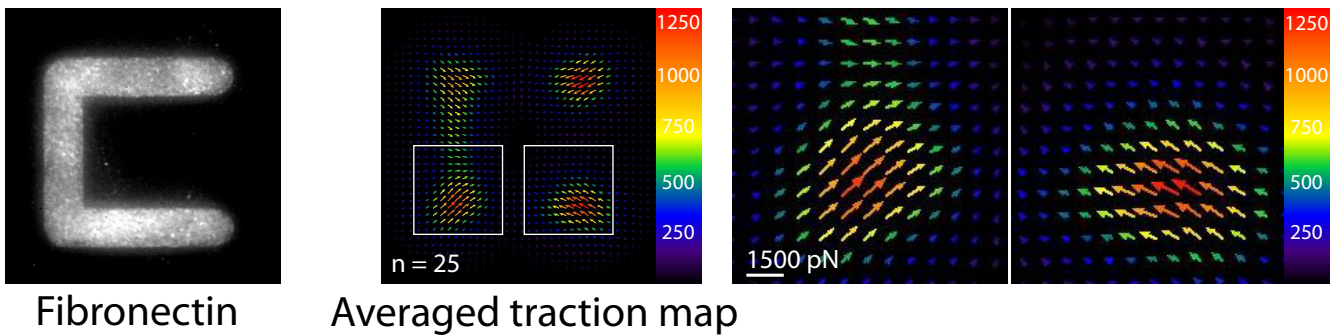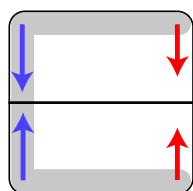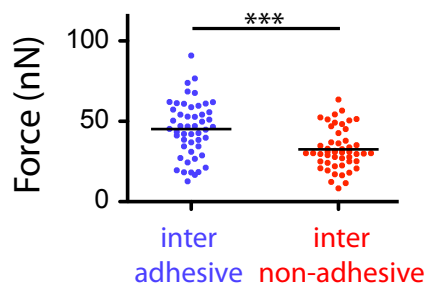

Supplement: 1106377109_sfig06.pdf [file 1106377109_sfig06.pdf]

Figure S7: Modeling of the energetic cost of intercellular junction positioning

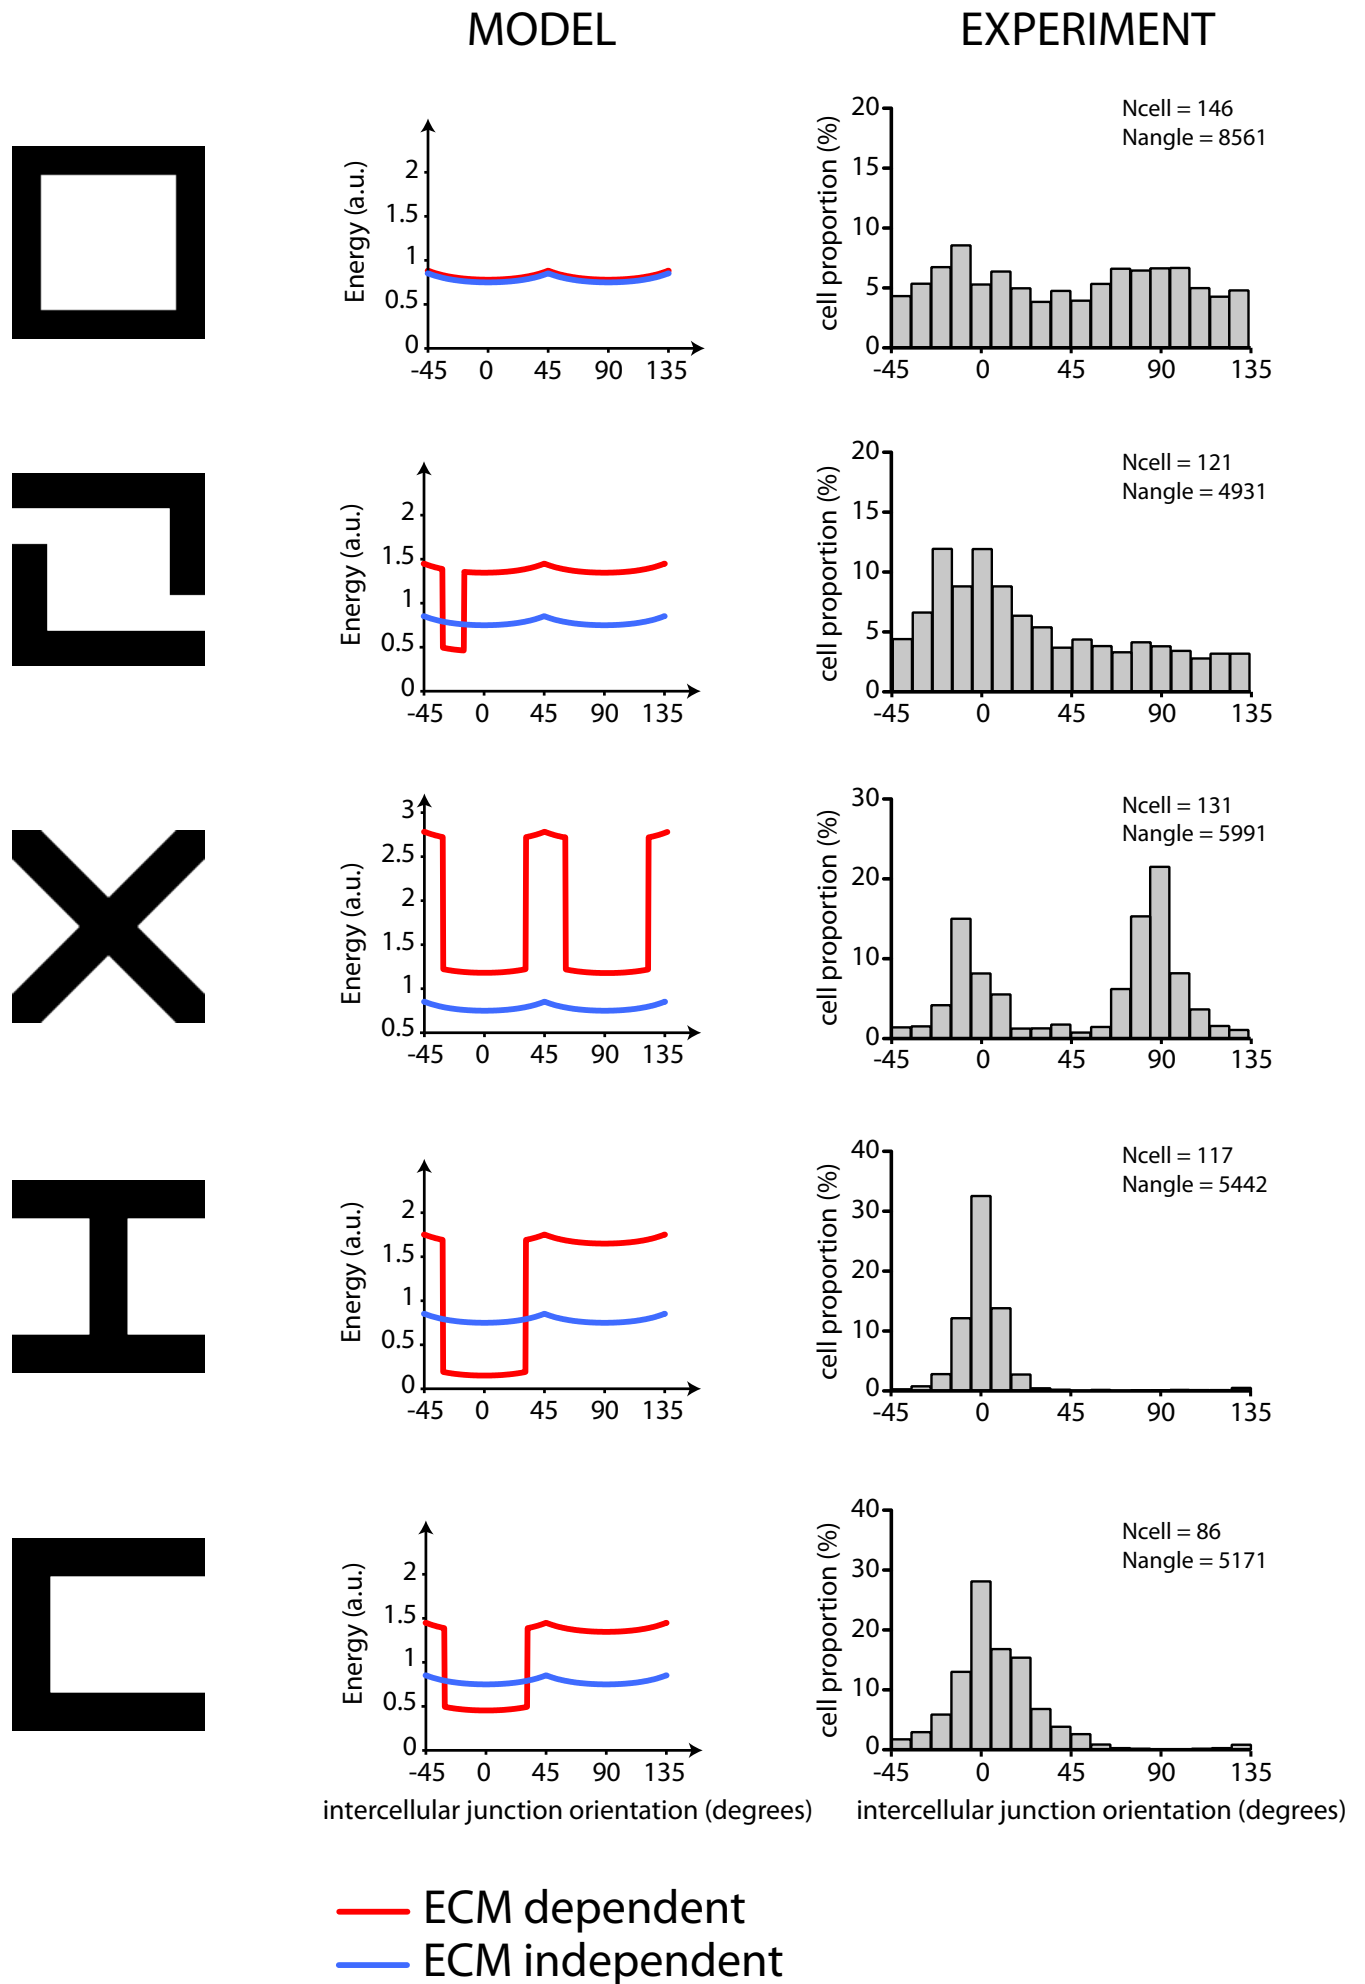

Supplement: 1106377109_sfig07.pdf [file 1106377109_sfig07.pdf]
